# Supplementary material for: Association of human breast cancer CD44-/CD24- cells with delayed distant metastasis
Source: eLife journal article supplement (doi:10.7554/elife.65418), 2021-07-28
Supplement: fig1-data1 [file 1A.xlsx]

## Sheet: Sheet1
metastasis
Yes(%)	No(%)
10	19
21	23
22	34
13	21
29	15
27	10
28	5
32	13
36	11
27	18
24	14
27	7
22	3
26	9
21	16
22	17
8	7
26	12
7	3
23	6
18	9
21	21
29	21
35	19
26	19
19	9
15	11
20	26
27	21
24	17
16	7
33	13
7	28
27	8
5	12
39	12
20	32
21	13
11	11
33	24
31	35
21	18
20	7
20	7
20	13
24	19
33	16
20	17
25	28
25	11
16	27
32	31
28	39
24	26
30	23
24	5
20	9
25	18
26	16
24	9
24	27
21	6
10	24
35	27
29	36
9	26
23	29
22	31
14	8
13	11
7	13
19	20
26	14
22	25
19	27
22	20
22	30
21	27
20	18
19	7
11	5
20	17
22	4
16	0
13	12
29	11
14	11
21	21
26	33
36	13
24	9
28	9
26	7
17	11
23	14
19	9
10	7
23	13
10	9
8	10
15	15
21	7
26	16
18	18
27	15
	25
	47
	19
	24
	14
	28
	32
	18
	7
	27
	11
	10
	24
	13
	11
	9
	9
	10
	19
	33
	23
	7
	5
	18
	15
	21
	11
	16
	17
	5
	21
	14
	17
	34
	16
	16
	15
	17
	25
	21
	16
	13
	27
	19
	5
	32
	19
	21
	5
	31
	29
	26
	15
	16
	23
	2
	41
	19
	14
	8
	17
	19
	9
	13
	8
	13
	11
	9
	16
	19
	13
	6
	17
	21
	2
	11
	14
	24
	13
	12
	11
	21
	18
	21
	12
	17
	20
	28
	23
	22
	18
	3
	7
	13
	17
	6
	19
	18
	24
	10
	22
	18
	13
	18
	19
	19
	18
	17
	12
	19
	12
	20
	8
	15
	19
	19
	19
	17
	18
	18
	17
	13
	7
	10
	9
	19
	21
	16
	15
	5
	6
	14
	19
	17
	24
	16
	11
	21
	20
	39
	11
	8
	26
	10
	28
