# Supplementary material for: Association of human breast cancer CD44-/CD24- cells with delayed distant metastasis
Source: eLife journal article supplement (doi:10.7554/elife.65418), 2021-07-28
Supplement: fig1-data1 [file 1B.xlsx]

## Sheet: Sheet1
	Metastasis
	Yes	No
CD44-CD24-（%）	10	19
	21	23
	22	34
	13	21
	29	15
	27	10
	28	5
	32	13
	36	11
	27	18
	24	14
	27	7
	22	3
	26	9
	21	16
	22	17
	8	7
	26	12
	7	3
	23	6
	18	9
	21	21
	29	21
	35	19
	26	19
	19	9
	15	11
	20	26
	27	21
	24	17
	16	7
	33	13
	7	28
	27	8
	5	12
	39	12
	20	32
	21	13
	11	11
	33	24
	31	35
	21	18
	20	7
	20	7
	20	13
	24	19
	33	16
	20	17
	25	28
	25	11
	16	27
	32	31
	28	39
	24	26
	30	23
	24	5
	20	9
	25	18
	26	16
	24	9
	24	27
	21	6
	10	24
	35	27
	29	36
	9	26
	23	29
	22	31
	14	8
	13	11
	7	13
	19	20
	26	14
	22	25
	19	27
	22	20
	22	30
	21	27
	20	18
	19	7
	11	5
	20	17
	22	4
	16	0
	13	12
	29	11
	14	11
	21	21
	26	33
	36	13
	24	9
	28	9
	26	7
	17	11
	23	14
	19	9
	10	7
	23	13
	10	9
	8	10
	15	15
	21	7
	26	16
	18	18
	27	15
		25
		47
		19
		24
		14
		28
		32
		18
		7
		27
		11
		10
		24
		13
		11
		9
		9
		10
		19
		33
		23
		7
		5
		18
		15
		21
		11
		16
		17
		5
		21
		14
		17
		34
		16
		16
		15
		17
		25
		21
		16
		13
		27
		19
		5
		32
		19
		21
		5
		31
		29
		26
		15
		16
		23
		2
		41
		19
		14
		8
		17
		19
		9
		13
		8
		13
		11
		9
		16
		19
		13
		6
		17
		21
		2
		11
		14
		24
		13
		12
		11
		21
		18
		21
		12
		17
		20
		28
		23
		22
		18
		3
		7
		13
		17
		6
		19
		18
		24
		10
		22
		18
		13
		18
		19
		19
		18
		17
		12
		19
		12
		20
		8
		15
		19
		19
		19
		17
		18
		18
		17
		13
		7
		10
		9
		19
		21
		16
		15
		5
		6
		14
		19
		17
		24
		16
		11
		21
		20
		39
		11
		8
		26
		10
		28
