# Supplementary material for: Association of human breast cancer CD44-/CD24- cells with delayed distant metastasis
Source: eLife journal article supplement (doi:10.7554/elife.65418), 2021-07-28
Supplement: fig1-data1 [file 1D.xlsx]

## Sheet: Sheet1
metastasis rate
Years	All patients	C1 patients	CD44-/CD24- >=2%
1	28.85	9.09091	36.36
2	23.08	9.09091	30.3
3	19.23	18.1818	18.18
4	13.46	27.2727	6.06
5	9.62	27.2727	3.03
6	5.77	9.09091	6.06
7	0	0	0
8	0	0	0
