# Supplementary material for: Association of human breast cancer CD44-/CD24- cells with delayed distant metastasis
Source: eLife journal article supplement (doi:10.7554/elife.65418), 2021-07-28
Supplement: fig1-data1 [file 1F.xlsx]

## Sheet: TNBC patients
Months	CD44-/CD24- cells >19.5%	CD44-/CD24- cells <19.5%		Months	CD44-/CD24- cells ≥19.5%	CD44-/CD24- cells <19.5%
				70	1
				70	1
				43	1
				69	1
				64	1
				45	1
				96	0
				48	1
				96	0
				96	0
				54	1
				83	1
				51	1
				36	1
				63	1
				77	1
				73	1
				69	1
				96	0
				96	0
				54	1
				78	1
				14	1
				96	0
				96	0
				78	1
				61	1
				74	1
				17	1
				96	0
				38	1
				96	0
				69	1
				81	1
				96	0
				61	1
				51	1
				84	1
				96	0
				58	1
				70	1
				65	1
				8	1
				75	1
				56	1
				96	0
				40	1
				96	0
				96	0
				96	0
				30	1
				96	0
				96		0
				96		0
				96		0
				96		0
				96		0
				52		1
				96		0
				72		1
				96		0
				43		1
				96		0
				96		0
				96		0
				96		0
				96		0
				96		0
				96		0
				56		1
				96		0
				96		0
				66		1
				96		0
				96		0
				37		1
				96		0
				96		0
				80		0
				96		0
				17		0
				37		1
				96		0
				96		0
				96		0
				96		0
				96		0
				96		0
				96		0
				96		0
				96		0
				8		1
				96		0
				96		0
				96		0
				96		0
				96		0
				96		0
				96		0
				47		1
				96		0
				96		0
				96		0
				96		0
				96		0
				77		0
				96		0
				96		0
				96		0
				41		1
				80		0
				96		0
				96		0
				96		0
				96		0
				96		0
				96		0
				63		1
				6		1
				51		1
				96		0
				96		0
				37		1
				96		0
				96		0
				73		1
				7		1
				96		0
				96		0
				65		1
				28		1
				96		0
