# Supplementary material for: Association of human breast cancer CD44-/CD24- cells with delayed distant metastasis
Source: eLife journal article supplement (doi:10.7554/elife.65418), 2021-07-28
Supplement: fig1-data1 [file 1G.xlsx]

## Sheet: luminal patients
Months	CD44-/CD24- cells ≥19.5%	CD44-/CD24- cells <19.5%
96	0
57	1
54	1
69	1
50	1
60	0
96	0
96	0
77	1
96	0
96	0
67	0
77	1
96	0
56	1
96	0
65	1
96	0
96	0
96	0
60	1
96	0
53	1
85	1
58	1
96	0
96	0
96	0
36	1
54	1
17	1
35	1
96	0
15		1
96		0
64		0
96		0
96		0
96		0
96		0
96		0
96		0
96		0
96		0
7		1
96		0
96		0
96		0
96		0
96		0
83		0
96		0
96		0
96		0
96		0
96		0
42		1
24		1
96		0
96		0
60		1
96		0
96		0
35		1
96		0
68		1
