# Supplementary material for: Association of human breast cancer CD44-/CD24- cells with delayed distant metastasis
Source: eLife journal article supplement (doi:10.7554/elife.65418), 2021-07-28
Supplement: fig1-figsupp2-data1 [file S2A.xlsx]

## Sheet: Sheet1
CD44+/CD24+	CD44-/CD24-	CD44-/CD24+	CD44+/CD24-
90	10	0	0
79	21	0	0
71	22	4	3
75	13	5	7
81	19	0	0
75	23	0	2
62	34	0	4
66	29	0	5
79	21	0	0
65	27	0	8
85	15	0	0
70	28	0	2
65	32	1	2
62	36	0	2
90	10	0	0
95	5	0	0
71	27	0	2
87	13	0	0
88	11	0	1
82	18	0	0
86	14	0	0
93	7	0	0
97	3	0	0
91	9	0	0
79	16	0	5
71	24	5	0
78	17	5	0
70	27	0	3
72	7	21	0
76	12	11	1
76	22	0	2
63	3	34	0
67	26	5	2
94	6	0	0
91	9	0	0
77	21	1	1
75	21	0	4
78	21	0	1
78	19	3	0
79	19	0	2
85	9	0	6
89	11	0	0
74	22	2	2
73	26	0	1
79	21	0	0
78	17	0	5
93	7	0	0
82	8	10	0
87	13	0	0
68	28	0	4
92	8	0	0
88	12	0	0
72	26	0	2
88	12	0	0
62	32	0	6
87	13	0	0
89	11	0	0
74	24	2	0
65	35	0	0
93	7	0	0
81	18	0	1
93	7	0	0
93	7	0	0
86	13	0	1
77	23	0	0
81	19	0	0
84	16	0	0
83	17	0	0
70	28	0	2
78	18	0	4
89	11	0	0
70	27	0	3
67	31	0	2
53	39	0	8
72	26	0	2
77	23	0	0
95	5	0	0
91	9	0	0
82	18	0	0
82	16	0	2
91	9	0	0
72	27	0	1
94	6	0	0
74	24	0	2
73	27	0	0
63	36	0	1
79	21	0	0
73	26	0	1
65	29	2	4
70	29	0	1
63	35	0	2
64	31	0	5
92	8	0	0
62	11	27	0
73	26	0	1
77	19	0	4
87	13	0	0
81	15	1	3
76	20	0	4
83	14	3	0
75	25	0	0
73	27	0	0
75	20	5	0
70	30	0	0
73	27	0	0
82	18	0	0
93	7	0	0
89	5	6	0
78	20	0	2
69	27	0	4
73	24	1	2
78	17	0	5
96	4	0	0
72	16	8	4
100	0	0	0
88	12	0	0
87	11	0	2
89	11	0	0
47	21	27	5
63	33	3	1
93	7	0	0
57	33	0	10
87	13	0	0
84	9	7	0
67	27	4	2
91	9	0	0
93	7	0	0
95	5	0	0
89	11	0	0
85	14	0	1
59	39	0	2
91	9	0	0
93	7	0	0
85	13	0	2
91	9	0	0
80	20	0	0
90	10	0	0
85	15	0	0
93	7	0	0
79	21	0	0
89	11	0	0
80	16	4	0
62	33	4	1
82	18	0	0
85	15	0	0
74	25	1	0
67	31	0	2
47	47	4	2
76	19	5	0
74	24	2	0
79	14	7	0
65	28	5	2
63	32	3	2
82	18	0	0
93	7	0	0
67	27	1	5
77	21	0	2
89	11	0	0
90	10	0	0
72	24	0	4
74	13	12	1
89	11	0	0
91	9	0	0
91	9	0	0
87	10	2	1
79	19	2	0
67	33	0	0
77	23	0	0
93	7	0	0
95	5	0	0
72	20	0	8
78	20	0	2
73	18	9	0
85	15	0	0
75	20	0	5
77	21	0	2
89	11	0	0
65	24	8	3
73	16	5	6
62	33	4	1
83	17	0	0
95	5	0	0
79	21	0	0
86	14	0	0
83	17	0	0
65	34	1	0
84	16	0	0
78	20	0	2
84	16	0	0
70	25	5	0
85	15	0	0
73	25	0	2
74	17	9	0
75	25	0	0
84	16	0	0
79	21	0	0
66	32	0	2
58	28	9	5
81	16	3	0
71	13	16	0
58	27	9	6
78	19	3	0
95	5	0	0
56	32	7	5
81	19	0	0
79	21	0	0
74	24	0	2
95	5	0	0
65	30	3	2
56	31	9	4
69	29	2	0
74	26	0	0
78	15	7	0
76	16	2	6
76	24	0	0
77	23	0	0
93	2	5	0
59	41	0	0
81	19	0	0
86	14	0	0
79	20	0	1
75	25	0	0
92	8	0	0
74	26	0	0
81	17	2	0
37	24	37	2
73	24	0	3
81	19	0	0
91	9	0	0
87	13	0	0
29	21	50	0
92	8	0	0
82	13	5	0
86	10	0	4
89	11	0	0
42	9	47	2
80	16	4	0
81	19	0	0
55	35	6	4
86	13	0	1
83	6	11	0
83	17	0	0
64	29	7	0
66	21	7	6
98	2	0	0
88	9	0	3
82	11	7	0
75	23	0	2
86	14	0	0
76	24	0	0
87	13	0	0
88	12	0	0
89	11	0	0
79	21	0	0
79	18	3	0
79	21	0	0
73	22	0	5
84	14	0	2
88	12	0	0
87	13	0	0
77	17	6	0
80	20	0	0
72	28	0	0
91	7	0	2
72	23	5	0
78	22	0	0
75	18	7	0
97	3	0	0
93	7	0	0
80	13	7	0
83	17	0	0
79	19	0	2
94	6	0	0
72	26	0	2
77	19	3	1
80	18	0	2
75	24	0	1
90	10	0	0
78	22	0	0
78	22	0	0
82	18	0	0
73	19	0	8
83	13	4	0
78	22	0	0
82	18	0	0
81	19	0	0
73	22	0	5
81	19	0	0
71	18	11	0
67	21	9	3
83	17	0	0
87	12	0	1
81	19	0	0
88	12	0	0
80	20	0	0
80	20	0	0
72	19	7	2
89	11	0	0
92	8	0	0
80	20	0	0
85	15	0	0
78	22	0	0
75	19	0	6
84	16	0	0
87	13	0	0
81	19	0	0
81	19	0	0
69	29	0	2
66	14	20	0
73	21	0	6
72	26	0	2
58	36	2	4
71	24	0	5
83	17	0	0
59	28	11	2
77	18	5	0
82	18	0	0
83	17	0	0
87	13	0	0
69	26	0	5
93	7	0	0
83	17	0	0
90	10	0	0
89	9	0	2
81	19	0	0
79	21	0	0
80	16	4	0
83	15	2	0
58	23	17	2
74	19	2	5
90	10	0	0
95	5	0	0
94	6	0	0
75	23	0	2
90	10	0	0
86	14	0	0
92	8	0	0
81	19	0	0
63	17	20	0
85	15	0	0
76	24	0	0
84	16	0	0
89	11	0	0
79	21	0	0
79	21	0	0
75	20	5	0
61	39	0	0
82	11	7	0
69	26	0	5
92	8	0	0
76	18	0	6
71	26	0	3
67	27	3	3
69	10	21	0
66	28	0	6
