# Supplementary material for: Association of human breast cancer CD44-/CD24- cells with delayed distant metastasis
Source: eLife journal article supplement (doi:10.7554/elife.65418), 2021-07-28
Supplement: fig1-figsupp2-data1 [file S2B.xlsx]

## Sheet: Sheet1
	metastasis rate
	CD44-/CD24- cells ≥19.5%	CD44-/CD24- cells <19.5%
Luminal	96.15	3.85
HER-2	83.33	16.67
TNBC	69.23	30.77
