# Supplementary material for: Association of human breast cancer CD44-/CD24- cells with delayed distant metastasis
Source: eLife journal article supplement (doi:10.7554/elife.65418), 2021-07-28
Supplement: fig1-figsupp2-data1 [file S2C.xlsx]

## Sheet: Sheet1
metastasis rate (%)
Years	CSC ratio high	CSC ratio low
1	3.175	9.52
2	11.111	0
3	9.524	4.76
4	12.698	11.9
5	39.683	16.67
6	15.873	40.48
7	7.937	14.29
8	0	2.38
