# Supplementary material for: Association of human breast cancer CD44-/CD24- cells with delayed distant metastasis
Source: eLife journal article supplement (doi:10.7554/elife.65418), 2021-07-28
Supplement: fig1-figsupp2-data1 [file S2E.xlsx]

## Sheet: Cd44-Cd24-
Months	CD44-/CD24- cells >19.5%	CD44-/CD24- cells <19.5%
66	1
60	1
96	0
43	0
70	1
96	0
57	1
70	1
54	1
43	1
51	1
69	1
50	1
50	1
69	1
96	0
96	0
64	1
45	1
96	0
96	0
60	0
53	1
96	0
96	0
96	0
48	1
96	0
96	0
96	0
96	0
96	0
96	0
96	0
96	0
96	0
96	0
77	1
96	0
96	0
68	1
51	1
96	0
53	1
96	0
96	0
96	0
49	0
96	0
96	0
54	1
83	1
51	1
96	0
36	1
67	0
25	1
63	1
77	1
73	1
70	1
96	0
69	1
96	0
96	0
96	0
96	0
96	0
56	1
96	0
96	0
96	0
54	1
78	1
14	1
96	0
28	1
55	1
96	0
96	0
54	1
65	1
78	1
96	0
96	0
61	1
70	1
96	0
96	0
96	0
60	1
74	1
96	0
96	0
96	0
53	1
96	0
96	0
67	1
39	1
64	1
53	1
51	1
85	1
56	1
58	1
96	0
17	1
96	0
96	0
96	0
38	1
95	0
96	0
96	0
96	0
69	1
96	0
81	1
96	0
61	1
51	1
36	1
84	1
96	0
58	1
70	1
65	1
8	1
54	1
17	1
75	1
56	1
51	1
96	0
56	1
40	1
96	0
96	0
35	1
96	0
96	0
30	1
96	0
14	1
32	0
70		1
15		1
96		0
96		0
96		1
96		0
64		1
96		1
96		1
96		1
96		1
96		1
96		1
96		1
96		1
96		0
96		0
96		1
96		1
96		0
96		0
96		0
96		1
96		0
96		0
96		0
52		1
96		0
96		0
96		0
96		0
96		0
96		0
72		0
96		0
96		0
96		0
96		1
96		0
96		0
96		1
43		1
96		0
5		1
96		0
96		0
96		0
96		0
96		0
96		0
96		1
57		1
96		1
7		0
96		1
96		0
96		1
96		1
96		1
96		1
56		1
96		0
96		1
96		0
96		0
66		0
96		0
96		0
96		1
96		0
37		0
96		0
96		1
96		1
96		1
80		0
96		1
96		1
96		0
17		0
37		1
96		1
96		1
96		0
90		0
96		1
96		1
96		0
96		0
96		0
96		1
96		1
96		0
96		0
96		0
96		1
96		0
96		0
96		1
96		1
96		1
96		1
96		1
96		1
96		1
96		1
96		0
96		1
96		0
83		0
8		0
96		1
96		0
96		0
96		0
36		0
96		1
96		0
96		1
96		0
96		1
96		1
96		1
96		1
96		0
96		1
96		1
96		1
96		1
47		1
96		1
96		1
96		1
96		1
96		0
96		1
96		1
96		0
65		0
96		1
96		0
96		0
96		1
96		0
96		1
42		0
96
11
96
24
96
96
77
96
96
14
96
96
96
96
96
41
96
80
96
96
96
96
96
96
96
60
63
96
96
96
6
51
96
96
37
96
96
96
96
96
96
73
96
96
96
96
96
35
7
96
96
69
96
68
96
96
65
96
96
96
96
28
96

## Sheet: CD44+CD24-
Months	CD44+/CD24- cells ≥2%	CD44+/CD24- cells <2%
96		0
96		0
96		0
96		0
96		0
96		0
83		0
96		0
96		0
96		0
96		0
96		0
39		1
85		1
96		0
96		0
58		1
11		1
95		0
96		0
96		0
96		0
96		0
96		0
96		0
57	1
96	0
96	0
28	1
96	0
70	1
96	0
96	0
53	1
96	0
96	0
14	1
60	1
14	1
