# Supplementary material for: Association of human breast cancer CD44-/CD24- cells with delayed distant metastasis
Source: eLife journal article supplement (doi:10.7554/elife.65418), 2021-07-28
Supplement: fig1-figsupp3-data1 [file S3A.xlsx]

## Sheet: luminal
Months	CD44-/CD24- cells >19.5%	CD44-/CD24- cells <19.5%
66	1
60	1
96	0
43	0
96	0
54	1
51	1
69	1
50	1
50	1
96	0
96	0
60	0
53	1
96	0
96	0
96	0
96	0
96	0
96	0
96	0
96	0
77	1
96	0
68	1
51	1
96	0
53	1
96	0
96	0
49	0
96	0
96	0
67	0
25	1
70	1
96	0
96	0
96	0
96	0
56	1
96	0
96	0
96	0
55	1
54	1
65	1
96	0
96	0
96	0
60	1
96	0
96	0
53	1
96	0
96	0
67	1
64	1
51	1
96	0
96	0
96	0
96	0
36	1
54	1
17	1
51	1
56	1
96	0
35	1
32	0
15		1
96		0
96		0
96		0
64		0
96		0
96		0
96		0
96		0
96		0
96		0
96		0
96		0
96		0
96		0
96		0
96		0
96		0
96		0
96		0
96		0
96		0
96		0
96		0
96		0
96		0
96		0
96		0
96		0
96		0
96		0
5		0
96		0
96		0
57		1
7		1
96		0
96		0
96		0
96		0
96		0
96		0
96		0
96		0
96		0
96		0
96		0
96		0
96		0
96		0
96		0
96		0
96		0
96		0
96		0
96		0
96		0
96		0
36		0
96		0
96		0
96		0
96		0
96		0
96		0
96		0
96		0
96		0
96		0
42		1
96		0
24		1
96		0
96		0
96		0
96		0
96		0
96		0
96		0
96		0
96		0
96		0
96		0
35		1
96		0
96		0
96		0
96		0

## Sheet: HER2
Months	CD44-/CD24- cells >19.5%	CD44-/CD24- cells <19.5%
96		0
96		0
96		0
96		0
96		0
83		0
96		0
96		0
96		0
96		0
96		0
96		0
96		0
11		1
96		0
96		0
14		1
96		0
60		1
96		0
96		0
96		0
57	1
96	0
96	0
96	0
96	0
28	1
96	0
70	1
96	0
96	0
39	1
53	1
85	1
58	1
96	0
95	0
14	1

## Sheet: TNBC
Months	CD44-/CD24- cells >19.5%	CD44-/CD24- cells <19.5%
70	1
70	1
43	1
69	1
96	0
64	1
45	1
96	0
96	0
48	1
96	0
96	0
96	0
54	1
83	1
51	1
36	1
63	1
77	1
73	1
69	1
96	0
96	0
54	1
78	1
14	1
96	0
96	0
96	0
78	1
61	1
74	1
56	1
17	1
96	0
96	0
38	1
96	0
69	1
81	1
96	0
61	1
51	1
84	1
96	0
58	1
70	1
65	1
8	1
75	1
56	1
96	0
40	1
96	0
96	0
96	0
30	1
96	0
70		1
96		0
96		0
96		0
96		0
96		0
52		1
96		0
72		1
96		0
43		1
96		0
96		0
96		0
96		0
96		0
96		0
96		0
96		0
96		0
56		1
96		0
96		0
66		1
96		0
96		0
37		1
96		0
96		0
80		0
96		0
17		0
37		1
90		0
96		0
96		0
96		0
96		0
96		0
96		0
96		0
96		0
96		0
96		0
96		0
96		0
8		1
96		0
96		0
96		0
96		0
96		0
96		0
96		0
96		0
96		0
47		1
96		0
96		0
96		0
96		0
65		1
96		0
96		0
77		0
96		0
96		0
96		0
96		0
41		1
80		0
96		0
96		0
96		0
96		0
96		0
96		0
63		1
96		0
96		0
6		1
51		1
96		0
96		0
37		1
96		0
96		0
96		0
73		1
96		0
7		1
69		1
96		0
68		1
96		0
96		0
65		1
28		1
96		0
