# Supplementary material for: Association of human breast cancer CD44-/CD24- cells with delayed distant metastasis
Source: eLife journal article supplement (doi:10.7554/elife.65418), 2021-07-28
Supplement: fig1-figsupp3-data1 [file S3B.xlsx]

## Sheet: 1
Months	CD44-/CD24- cells ≥19.5%	CD44-/CD24- cells <19.5%
96	0
96	0
96	0
96	0
64	0
96	0
96	0
96	0
96	0
96	0
96	0
96	0
96	0
96	0
96	0
96	0
96	0
96	0
96	0
96	0
96	0
52	1
96	0
96	0
72	1
96	0
96	0
96	0
96	0
96	0
96	0
43	1
96	0
5	0
96	0
96	0
96	0
96	0
57	1
96	0
96	0
96	0
96	0
56	1
96	0
96	0
96	0
96	0
66	1
96	0
96	0
96	0
96	0
37	1
96	0
96	0
96	0
96	0
80	0
96	0
96	0
96	0
17	0
37	1
96	0
96	0
96	0
96	0
96	0
96	0
96	0
96	0
96	0
96	0
96	0
96	0
96	0
96	0
96	0
96	0
96	0
96	0
96	0
83	0
8	1
96	0
96	0
96	0
96	0
96	0
96	0
96	0
96	0
96	0
96	0
96	0
96	0
96	0
96	0
47	1
96	0
96	0
96	0
96	0
96	0
96	0
96	0
96	0
96	0
96	0
96	0
96	0
96	0
42	1
96	0
96	0
24	1
96	0
96	0
77	0
14	1
96	0
96	0
96	0
96	0
96	0
41	1
80	0
96	0
96	0
96	0
96	0
96	0
96	0
96	0
60	1
63	1
96	0
6	1
51	1
96	0
96	0
37	1
96	0
96	0
96	0
96	0
73	1
96	0
96	0
96	0
35	1
7	1
96	0
96	0
96	0
65	1
96	0
96	0
96	0
28	1
96	0
96		0
43		0
70		1
70		1
43		1
51		1
69		1
69		1
64		1
45		1
96		0
96		0
60		0
53		1
96		0
96		0
48		1
96		0
96		0
96		0
96		0
96		0
96		0
96		0
68		1
51		1
96		0
53		1
96		0
96		0
96		0
96		0
54		1
83		1
51		1
96		0
36		1
67		0
25		1
63		1
77		1
73		1
70		1
96		0
69		1
96		0
96		0
96		0
96		0
96		0
96		0
96		0
54		1
78		1
14		1
96		0
55		1
96		0
54		1
78		1
96		0
61		1
70		1
96		0
96		0
96		0
60		1
74		1
96		0
96		0
53		1
96		0
96		0
67		1
39		1
64		1
53		1
51		1
85		1
58		1
96		0
17		1
96		0
96		0
38		1
95		0
96		0
96		0
96		0
69		1
96		0
81		1
96		0
61		1
51		1
36		1
84		1
96		0
58		1
70		1
65		1
8		1
54		1
75		1
56		1
51		1
96		0
56		1
40		1
96		0
96		0
35		1
96		0
96		0
30		1
96		0
14		1
32		0
