# Supplementary material for: Association of human breast cancer CD44-/CD24- cells with delayed distant metastasis
Source: eLife journal article supplement (doi:10.7554/elife.65418), 2021-07-28
Supplement: fig2-data1 [file 2A.xlsx]

## Sheet: Sheet1
	metastasis rate
	CD44-/CD24- cells ≥19.5%	CD44-/CD24- cells <19.5%
Luminal	22.727	8.889
HER-2	50	18.421
TNBC	41.667	15
