# Supplementary material for: Association of human breast cancer CD44-/CD24- cells with delayed distant metastasis
Source: eLife journal article supplement (doi:10.7554/elife.65418), 2021-07-28
Supplement: fig2-data1 [file 2C.xlsx]

## Sheet: Cd44-Cd24-
Months	CD44-/CD24- cells >19.5%	CD44-/CD24- cells <19.5%
66	1
60	1
96	0
43	0
70	1
96	0
57	1
70	1
54	1
43	1
51	1
69	1
50	1
50	1
69	1
96	0
96	0
64	1
45	1
96	0
96	0
60	0
53	1
96	0
96	0
96	0
48	1
96	0
96	0
96	0
96	0
96	0
96	0
96	0
96	0
96	0
96	0
77	1
96	0
96	0
68	1
51	1
96	0
53	1
96	0
96	0
96	0
49	0
96	0
96	0
54	1
83	1
51	1
96	0
36	1
67	0
25	1
63	1
77	1
73	1
70	1
96	0
69	1
96	0
96	0
96	0
96	0
96	0
56	1
96	0
96	0
96	0
54	1
78	1
14	1
96	0
28	1
55	1
96	0
96	0
54	1
65	1
78	1
96	0
96	0
61	1
70	1
96	0
96	0
96	0
60	1
74	1
96	0
96	0
96	0
53	1
96	0
96	0
67	1
39	1
64	1
53	1
51	1
85	1
56	1
58	1
96	0
17	1
96	0
96	0
96	0
38	1
95	0
96	0
96	0
96	0
69	1
96	0
81	1
96	0
61	1
51	1
36	1
84	1
96	0
58	1
70	1
65	1
8	1
54	1
17	1
75	1
56	1
51	1
96	0
56	1
40	1
96	0
96	0
35	1
96	0
96	0
30	1
96	0
14	1
32	0
70		1
15		1
96		0
96		0
96		1
96		0
64		1
96		1
96		1
96		1
96		1
96		1
96		1
96		1
96		1
96		0
96		0
96		1
96		1
96		0
96		0
96		0
96		1
96		0
96		0
96		0
52		1
96		0
96		0
96		0
96		0
96		0
96		0
72		0
96		0
96		0
96		0
96		1
96		0
96		0
96		1
43		1
96		0
5		1
96		0
96		0
96		0
96		0
96		0
96		0
96		1
57		1
96		1
7		0
96		1
96		0
96		1
96		1
96		1
96		1
56		1
96		0
96		1
96		0
96		0
66		0
96		0
96		0
96		1
96		0
37		0
96		0
96		1
96		1
96		1
80		0
96		1
96		1
96		0
17		0
37		1
96		1
96		1
96		0
90		0
96		1
96		1
96		0
96		0
96		0
96		1
96		1
96		0
96		0
96		0
96		1
96		0
96		0
96		1
96		1
96		1
96		1
96		1
96		1
96		1
96		1
96		0
96		1
96		0
83		0
8		0
96		1
96		0
96		0
96		0
36		0
96		1
96		0
96		1
96		0
96		1
96		1
96		1
96		1
96		0
96		1
96		1
96		1
96		1
47		1
96		1
96		1
96		1
96		1
96		0
96		1
96		1
96		0
65		0
96		1
96		0
96		0
96		1
96		0
96		1
42		0
96
11
96
24
96
96
77
96
96
14
96
96
96
96
96
41
96
80
96
96
96
96
96
96
96
60
63
96
96
96
6
51
96
96
37
96
96
96
96
96
96
73
96
96
96
96
96
35
7
96
96
69
96
68
96
96
65
96
96
96
96
28
96

## Sheet: 1
Months	CD44-/CD24- cells ≥19.5%	CD44-/CD24- cells <19.5%
18		1
13		1
96		0
94		0
75		0
49		1
43		1
77		0
96		0
96		0
77		0
79		0
96		0
96		0
96		0
96		0
82		0
77		0
96		0
76		0
96		0
96		0
80		0
76		0
77		0
87		0
86		0
82		0
75		0
77		0
96		0
79		0
79		0
77		0
95		0
78		0
79		0
96		0
77		0
77		0
96		0
96		0
55		1
76		0
29		1
72		0
77		0
96		0
96		0
96		0
96		0
73		0
74		0
74		0
96		0
79		0
84		0
96		0
92		0
78		0
16		1
79		0
79		0
96		0
82		0
83		0
75		0
79		0
79		0
34		1
96		0
75		0
93		0
96		0
96		0
77		0
96		0
96		0
89		0
81		1
77		0
76		1
90		0
96		0
96		0
59		1
96		0
96		0
37		1
78		0
96		0
76		0
96		0
76		0
96		0
80		0
73		0
78		0
75		0
76		0
96		0
76		0
23		1
76		0
78		0
96		0
79		0
21		1
96		0
78		0
77		0
78		0
75		0
53		1
96		0
76		0
76		0
27		1
76		0
44		1
80		0
77	0
74	0
78	0
18	1
93	0
24	1
79	0
72	0
72	0
18	1
96	0
96	0
79	0
76	0
75	0
77	0
96	0
29	1
82	0
60	1
72	1
75	0
74	0
54	1
96	0
96	0
79	0
96	0
75	0
96	0
81	0
96	0
83	0
38	1
77	0
29	1
9	1
77	0
77	0
29	1
46	1
63	1
88	0
77	0
77	0
76	0
78	0
74	1
40	1
72	1
56	1
88	0
41	1
76	0
78	0
26	1
21	1
87	1
35	1
41	1
39	1
94	0
78	0
41	1
76	0
31	1
96	0
78	0
96	0
76	0
96	0
81	1
77	0
96	0
75	0
93	0
76	0
62	1
76	0
77	0
26	1
30	1
90	0
78	0
66	1
63	1
75	0
74	1
88	0
96	0
79	0
54	1
78	0
92	0
96	0
76	1
42	1
96	0
96	0
33	1
