# Supplementary material for: Association of human breast cancer CD44-/CD24- cells with delayed distant metastasis
Source: eLife journal article supplement (doi:10.7554/elife.65418), 2021-07-28
Supplement: fig2-figsupp1-data1 [file S4A.xlsx]

## Sheet: luminal
Months	CD44-/CD24- cells >19.5%	CD44-/CD24- cells <19.5%
75		0
19		1
77		0
77		0
79		0
77		0
76		0
76		0
75		0
79		0
79		0
78		0
79		0
77		0
76		0
77		0
73		0
74		0
74		0
79		0
75		0
79		0
79		0
34		0
75		0
77		0
77		0
48		1
22		1
76		0
76		0
78		0
75		0
76		0
76		0
76		0
78		0
79		0
78		0
77		0
75		0
44		1
76		0
76		0
44		0
77	0
74	0
79	0
72	0
79	0
75	0
77	0
32	1
75	0
31	1
79	0
25	1
77	0
77	0
77	0
63	0
88	0
77	0
13	1
40	0
88	0
76	0
78	0
2	1
11	1
41	0
76	0
31	1
78	0
73	1
77	0
96	0
75	0
76	0
76	0
77	0
90	0
13	1
88	0
79	0
78	0
76	0
41	1
33	0

## Sheet: HER2
Months	CD44-/CD24- cells >19.5%	CD44-/CD24- cells <19.5%
78	0
18	0
53	1
72	0
13	1
96	0
76	0
7	1
60	1
72	0
46	1
12	1
69	1
96	0
8	1
77	0
17	1
60	1
48	1
4	1
20	1
22	1
94	0
78	0
76	0
93	0
35	1
26	0
78	0
28	1
54	0
18		0
49		0
96		0
39		1
82		0
77		0
87		0
82		0
77		0
77		0
95		0
77		0
96		0
96		0
55		0
29		1
72		0
79		0
84		0
96		0
92		0
78		0
96		0
82		0
8		1
93		0
96		0
96		0
89		0
81		0
12		1
30		1
78		0
73		0
21		0
20		1
76		0

## Sheet: TNBC
Months	CD44-/CD24- cells >19.5%	CD44-/CD24- cells <19.5%
13		0
96		0
94		0
96		0
96		0
96		0
96		0
66		1
96		0
96		0
80		0
86		0
96		0
96		0
96		0
96		0
96		0
96		0
27		1
6		1
79		0
96		0
96		0
96		0
96		0
96		0
96		0
96		0
96		0
96		0
96		0
80		0
96		0
10		1
59		1
96		0
78		0
96		0
80		0
9	1
96	0
96	0
74	0
96	0
96	0
96	0
20	1
9	0
8	1
11	1
60	1
22	1
87	0
96	0
4	1
96	0
10	1
35	1
75	0
43	1
21	1
96	0
96	0
96	0
