# Supplementary material for: Association of human breast cancer CD44-/CD24- cells with delayed distant metastasis
Source: eLife journal article supplement (doi:10.7554/elife.65418), 2021-07-28
Supplement: fig2-figsupp1-data1 [file S4B.xlsx]

## Sheet: luminal
Months	CD44-/CD24- cells >19.5%	CD44-/CD24- cells <19.5%
77	0
74	0
79	0
72	0
79	0
75	0
77	0
60	1
75	0
54	1
79	0
38	1
77	0
77	0
77	0
63	1
88	0
77	0
74	1
40	1
88	0
76	0
78	0
21	1
35	1
41	1
76	0
31	1
78	0
81	1
77	0
96	0
75	0
76	0
76	0
77	0
90	0
74	1
88	0
79	0
78	0
76	1
42	1
33	1
75		0
43		1
77		0
77		0
79		0
77		0
76		0
76		0
75		0
79		0
79		0
78		0
79		0
77		0
76		0
77		0
73		0
74		0
74		0
79		0
75		0
79		0
79		0
34		1
75		0
77		0
77		0
76		1
59		1
76		0
76		0
78		0
75		0
76		0
76		0
76		0
78		0
79		0
78		0
77		0
75		0
53		1
76		0
76		0
44		1

## Sheet: HER2
Months	CD44-/CD24- cells >19.5%	CD44-/CD24- cells <19.5%
18		1
49		1
96		0
96		0
82		0
77		0
87		0
82		0
77		0
77		0
95		0
77		0
96		0
96		0
55		1
29		1
72		0
79		0
84		0
96		0
92		0
78		0
96		0
82		0
83		0
93		0
96		0
96		0
89		0
81		1
90		0
37		1
78		0
73		0
21		1
27		1
76		0
78	0
18	1
93	0
72	0
18	1
96	0
76	0
29	1
82	0
72	1
96	0
75	0
81	0
96	0
83	0
77	0
76	0
78	0
56	1
41	1
41	1
39	1
94	0
78	0
76	0
93	0
62	1
26	1
78	0
66	1
54	1

## Sheet: TNBC
Months	CD44-/CD24- cells >19.5%	CD44-/CD24- cells <19.5%
24		1
96		0
96		0
74		0
96		0
96		0
96		0
29		1
9		1
29		1
46		1
72		1
26		1
87		1
96		0
96		0
96		0
30		1
63		1
75		0
96		0
92		0
96		0
96		0
96		0
13	1
96	0
94	0
96	0
96	0
96	0
96	0
96	0
96	0
96	0
80	0
86	0
96	0
96	0
96	0
96	0
96	0
96	0
96	0
16	1
79	0
96	0
96	0
96	0
96	0
96	0
96	0
96	0
96	0
96	0
96	0
80	0
96	0
23	1
96	0
96	0
78	0
96	0
80	0
