# Supplementary material for: Association of human breast cancer CD44-/CD24- cells with delayed distant metastasis
Source: eLife journal article supplement (doi:10.7554/elife.65418), 2021-07-28
Supplement: fig2-figsupp1-data1 [file S4C.xlsx]

## Sheet: 1
Months	CD44-/CD24- cells >19.5%	CD44-/CD24- cells <19.5%
18		0
53		1
72		0
72		0
96		0
96		0
76		0
75		0
77		0
96		0
72		0
96		0
79		0
96		0
96		0
8		1
77		0
77		0
17		1
60		1
60		1
48		1
88		0
76		0
78		0
87		0
94		0
76		0
78		0
76		0
73		1
77		0
75		0
93		0
76		0
35		1
77		0
26		0
28		1
88		0
43		1
79		0
78		0
96		0
41		1
96		0
96		0
18	0
96	0
94	0
75	0
49	0
96	0
96	0
77	0
79	0
96	0
96	0
96	0
82	0
77	0
76	0
96	0
96	0
80	0
76	0
77	0
87	0
86	0
82	0
77	0
96	0
79	0
77	0
95	0
78	0
79	0
96	0
77	0
96	0
76	0
29	1
72	0
77	0
96	0
96	0
96	0
96	0
73	0
74	0
79	0
96	0
92	0
79	0
79	0
96	0
82	0
8	1
75	0
79	0
34	0
96	0
75	0
93	0
96	0
96	0
96	0
96	0
81	0
77	0
48	1
96	0
96	0
22	1
96	0
96	0
30	1
78	0
76	0
96	0
76	0
96	0
80	0
75	0
76	0
76	0
10	1
78	0
59	1
79	0
21	0
96	0
78	0
78	0
75	0
44	1
96	0
76	0
76	0
76	0
44	0
