# Supplementary material for: Association of human breast cancer CD44-/CD24- cells with delayed distant metastasis
Source: eLife journal article supplement (doi:10.7554/elife.65418), 2021-07-28
Supplement: fig2-figsupp1-data1 [file S4D.xlsx]

## Sheet: DFS
Months	CD44-/CD24- cells >19.5%	CD44-/CD24- cells <19.5%
18		0
13		0
96		0
94		0
75		0
49		0
96		0
96		0
77		0
79		0
96		0
96		0
96		0
82		0
77		0
76		0
96		0
96		0
80		0
76		0
77		0
87		0
86		0
82		0
75		0
77		0
96		0
79		0
77		0
95		0
78		0
79		0
96		0
77		0
77		0
96		0
55		0
76		0
29		1
72		0
77		0
96		0
96		0
96		0
96		0
73		0
74		0
79		0
96		0
92		0
78		0
79		0
79		0
96		0
82		0
8		1
75		0
79		0
79		0
34		0
96		0
75		0
93		0
96		0
96		0
96		0
96		0
81		0
77		0
48		1
96		0
96		0
22		1
96		0
96		0
30		1
78		0
96		0
76		0
96		0
76		0
96		0
80		0
78		0
75		0
76		0
76		0
10		1
78		0
59		1
79		0
21		0
96		0
78		0
78		0
75		0
44		1
96		0
76		0
76		0
76		0
44		0
78	0
18	0
53	1
72	0
72	0
96	0
96	0
79	0
76	0
75	0
77	0
96	0
72	0
96	0
79	0
96	0
96	0
8	1
9	0
77	0
77	0
17	1
60	1
40	0
60	1
48	1
88	0
76	0
78	0
87	0
94	0
76	0
78	0
76	0
73	1
77	0
75	0
93	0
76	0
35	1
77	0
26	0
28	1
88	0
43	1
79	0
78	0
96	0
41	1
96	0
96	0

## Sheet: OS
Months	CD44-/CD24- cells >19.5%	CD44-/CD24- cells <19.5%
18		1
13		1
96		0
94		0
75		0
49		1
96		0
96		0
77		0
79		0
96		0
96		0
96		0
82		0
77		0
76		0
96		0
96		0
80		0
76		0
77		0
87		0
86		0
82		0
75		0
77		0
96		0
79		0
77		0
95		0
78		0
79		0
96		0
77		0
77		0
96		0
55		1
76		0
29		1
72		0
77		0
96		0
96		0
96		0
96		0
73		0
74		0
79		0
96		0
92		0
78		0
79		0
79		0
96		0
82		0
83		0
75		0
79		0
79		0
34		1
96		0
75		0
93		0
96		0
96		0
96		0
96		0
81		1
77		0
76		1
96		0
96		0
59		1
96		0
96		0
37		1
78		0
96		0
76		0
96		0
76		0
96		0
80		0
78		0
75		0
76		0
76		0
23		1
78		0
96		0
79		0
21		1
96		0
78		0
78		0
75		0
53		1
96		0
76		0
76		0
76		0
44		1
78	0
18	1
93	0
72	0
72	0
96	0
96	0
79	0
76	0
75	0
77	0
96	0
72	1
96	0
79	0
96	0
96	0
83	0
9	1
77	0
77	0
76	0
78	0
40	1
72	1
56	1
88	0
76	0
78	0
87	1
94	0
76	0
78	0
76	0
81	1
77	0
75	0
93	0
76	0
62	1
77	0
26	1
66	1
88	0
96	0
79	0
78	0
96	0
42	1
96	0
96	0
