# Supplementary material for: Association of human breast cancer CD44-/CD24- cells with delayed distant metastasis
Source: eLife journal article supplement (doi:10.7554/elife.65418), 2021-07-28
Supplement: fig4-data1 [file fig 4A.xlsx]

## Sheet: 大小
WT CSC	WT-/- CSC
79.5	92.1
70.1	80.5
79.1	68.7
81.2	93.8
78.8	79.5
66.9	78.1
64.8	82.6
79.5	62.7
75.3	91.3
72.5	81.6
80.5	71.8
87.2	73.6
80.2	75
86.2	76.7
77.1	77.4
98.4	66.3
67.7	78.1
64.9	81.3
61	64.2
81.3	83.7
92.1	60.3
79.5	61.7
101	62.8
67.7	61
79.5	76.7
80.2	102
92.1	64.2
67	61.7
	70.5

## Sheet: 数量
WT CSC	WT-/- CSC
5	8
7	5
7	8
5	2
4	6
