# Supplementary material for: Association of human breast cancer CD44-/CD24- cells with delayed distant metastasis
Source: eLife journal article supplement (doi:10.7554/elife.65418), 2021-07-28
Supplement: fig4-data1 [file fig 4B.xlsx]

## Sheet: 工作表1
	WT CSC			WT-/- CSC
24h	0.735	0.796	0.682	0.733	0.647	0.728
48h	1.057	0.884	1.083	0.843	0.932	1.051
72h	1.586	1.498	1.531	1.464	1.429	1.434
