# Supplementary material for: Association of human breast cancer CD44-/CD24- cells with delayed distant metastasis
Source: eLife journal article supplement (doi:10.7554/elife.65418), 2021-07-28
Supplement: fig4-data1 [file Fig 4C.xls]

## Sheet: Sheet1
CSC rate（%）
From	231	CD44-CD24-
	98.2	96.6
	97.4	97.9
	96.9	98.5
7day	40.6	44.5
	41.8	42.7
	44.1	43.1
