# Supplementary material for: Association of human breast cancer CD44-/CD24- cells with delayed distant metastasis
Source: eLife journal article supplement (doi:10.7554/elife.65418), 2021-07-28
Supplement: fig5-data1 [file fig 5A.xlsx]

## Sheet: 工作表1
	WT CSC			WT-/- CSC
tumor size(mm2)	696.1	647.4	871.6	918.8	742.8	736.1
weight(g)	1.56	1.75	1.81	2.02	1.73	1.62
