# Supplementary material for: Association of human breast cancer CD44-/CD24- cells with delayed distant metastasis
Source: eLife journal article supplement (doi:10.7554/elife.65418), 2021-07-28
Supplement: fig5-data1 [file fig 5B.xls]

## Sheet: Sheet1
CSC rate（%）
From	231	CD44-CD24-
	30.1	32.2
	33.9	24.9
	26.7	25.7
