# Supplementary material for: Association of human breast cancer CD44-/CD24- cells with delayed distant metastasis
Source: eLife journal article supplement (doi:10.7554/elife.65418), 2021-07-28
Supplement: fig5-data1 [file fig 5C.xlsx]

## Sheet: 工作表1
	WT CSC			WT-/- CSC
tumor size(mm2)	8.1	6.3	7.8	7.2	7.6	6.9
weight(*102mg)	19.2	21.3	18.5	15.7	17.8	19.6
