# Supplementary material for: Association of human breast cancer CD44-/CD24- cells with delayed distant metastasis
Source: eLife journal article supplement (doi:10.7554/elife.65418), 2021-07-28
Supplement: fig6-data1 [file 6D.xlsx]

## Sheet: Sheet1
	CD44+CD24- cells			CD44-CD24- cells			CD44+CD24- cells from CD44-CD24- cells
ATP8B3	0.199836	0.196246	0.205389	0.98	1.13	1.02	0.65	0.8	0.62
DSCC1	0.143877	0.144531	0.165009	0.99	1.07	1.01	1.91909	1.6722	2.07052
G2E3	0.144299	0.144213	0.138788	1.01163	1.0102	0.988505	1.20219	1.3129	1.18386
MED22	0.129656	0.133141	0.135059	0.984725	0.81862	1.01551	1.04348	0.9699	1.0214
ZNF710	0.214556	0.23095	0.24324	0.876841	1.11851	1.14046	1.54553	0.643793	0.471187
SLC34F5	0.127759	0.134292	0.13176	1.03089	1.04289	0.97004	1.20032	1.11795	1.08246
ARL6IP1	0.14266	0.136451	0.138678	1.03694	0.98186	0.964379	1.05014	1.12869	1.07143
PPME1	1.47177	1.59431	1.43989	1.01159	0.88581	0.988545	1.38259	1.44062	1.4863
RHBDL2	2.3681	2.09103	2.53952	1.00193	0.6065	0.998072	1.95111	2.03875	2.15902
BICD2	0.214271	0.351604	0.607466	1.0769	0.723666	0.92859	1.14723	1.05819	0.707147
HIST1H	1.87195	1.81968	1.85794	1.02435	0.994589	0.976228	1.34216	1.47433	1.36828
