# Supplementary material for: Association of human breast cancer CD44-/CD24- cells with delayed distant metastasis
Source: eLife journal article supplement (doi:10.7554/elife.65418), 2021-07-28
Supplement: fig6-data1 [file pheatmap_reorder.xls]

id	F_count	Z_count	S_count
ATP8B3	447	27.33333333	179.3333333
MED22	1855	443.6666667	848.6666667
PPME1	15964.33333	2628.666667	5882
ZNF710	214.6666667	5	39
BICD2	969	141.6666667	296.3333333
G2E3	1798	115.6666667	175.6666667
ARL6IP1	23634.92	5829.223333	5587.746667
RHBDL2	159	0	186.3333333
HIST1H4H	795.3333333	117.3333333	805.3333333
SLC35F5	1398	358.6666667	1094.666667
DSCC1	892.3333333	173.3333333	576
