# Supplementary material for: Association of human breast cancer CD44-/CD24- cells with delayed distant metastasis
Source: eLife journal article supplement (doi:10.7554/elife.65418), 2021-07-28
Supplement: fig7-data1 [file fig 7F.xlsx]

## Sheet: 7-1
num. of spheres
CTL	siRHBDL2
10	3
8	4
9	5

## Sheet: 7-2
diameter (um)
CTL	siRHBDL2
134.7	57.6
164.5	69.9
173.2	38.1

## Sheet: 7-3
num. of spheres
CTL	siRHBDL2
9	2
11	4
9	3

## Sheet: 7-4
diameter (um)
CTL	siRHBDL2
134.7	58.3
129.6	43.6
153.2	37.2
