# Supplementary material for: Association of human breast cancer CD44-/CD24- cells with delayed distant metastasis
Source: eLife. 2021 Jul 28;10:e65418. doi: 10.7554/eLife.65418 (PMC8346282; doi:10.7554/eLife.65418)
Supplement: Source data 1. [file elife-65418-data1.xlsx]

## Sheet: training group
序号	CD44+/CD24+	CD44-/CD24-	CD44-/CD24+	CD44+/CD24-	N分期	年龄	Age(51)	tumor size	T分期	绝经年龄	是否绝经 绝经1 未绝经0	ER状态	PR状态	HER2状态	Ki67状态	手术日期	转移时间(原)	转移	DFS	死亡	OS	死亡时间	分型	临床分期	术后首次化疗开始时间2009年(方案)	是否化疗（0否1是）	是否放疗	是否放疗（0否1是）	放疗方案	是否内分泌治疗（药物，持续时间）	内分泌（0否1是）	新辅助化疗	新辅助化疗方案和周期
1	61	35	1	3	0	78	1	0.8	1	50	1	0	1	0	1	2006-05-22	2007-01-01	1	7	0	96	2019/9/1	luminal A	Ⅰ	否	0	是	1	胸壁，锁骨上	是，弗隆，时长不详	1
2	70	30	0	0	0	33	0	1.2	1	33	1	0	0	0	1	2006-07-07	2012-06-01	1	70	0	96	2019/9/1	TNBC
3	55	33	5	7	2	68	1	3.5	2	45	1	1	1	0	1	2006-06-27	2019/9	1	15	0	96	2019/9/1	luminal A	Ⅲa						弗隆	1
4	61	39	0	0	1	59	1	1.1	1	54	1	1	1	0	1	2007-12-19	2019/9	0	96	0	96	2019/9/1	luminal A	Ⅱa	2008-02-15（TEC*6）	1	是	1		弗隆	1
5	55	43	0	2	1	44	0	1.2	1	未闭经	0	1	1	0	1	2007-12-17	2012-05-01	0	96	0	96	2019/9/1	luminal A	Ⅱa	2008-01-15（CEF*6）	1	是	1		它莫昔芬	1
6	42	54	0	4	3	55	1	2.5	2	51	1	1	1	0	1	2007-11-23	2019/9	0	43	1	43	2011-07-01	luminal A	Ⅲc	（CEF*6）	1	是	1
7	46	49	0	5	0	47	0	1	1	未绝经	0	0	0	0	1	2006-07-11	2012-06-01	1	70	0	96	2019/9/1	TNBC	Ⅰ	TAC术后3次	1						是	TAC术前3次
8	59	41	0	0	1	45	0	2	1	未闭经	0	1	1	0	1	2007-12-12	2019/9	0	96	0	96	2019/9/1	luminal A	Ⅱb
9	45	47	0	8	0	71	1	1.8	1	45	1	1	1	1	3	2007-11-28	2010-09-01	1	57	0	96	2019/9/1	HEr2过表达型	Ⅰ	无	0	是	1		它莫昔芬2年多后发现骨转移，改为弗隆	1
10	65	35	0	0	0	42	0	0.5	1	未闭经	0	1	1	0	1	2007-12-28	2019/9	0	96	0	96	2019/9/1	luminal A		2008.1.6CEF*6	1	是	1	胸壁
11	50	48	0	2	0	47	0	1	1	未绝经	0	0	0	0	1	2006-07-11	2012-06-01	1	70	0	96	2019/9/1	TNBC	Ⅰ	2006.7.31TAC*3	1	是	1	胸壁，腋窝，锁骨上下			是	TAC3次
12	42	56	0	2	0	55	1	1	1	53	1	0	0	0	1	2006-06-01	2010-01-01	1	43	0	96	2019/9/1	TNBC	Ⅰ	2006.6.15NE	1
13	70	30	0	0	0	51	1	0.5	1	39	1	1	1	0	1	2006-06-01	2019/9	0	96	0	96	2019/9/1	luminal A		2006.6.15CEF	1
14	75	25	0	0	0	49	0	0.5	1	未闭经	0	0	0	0	1	2008-03-03	2019/9	0	96	0	96	2019/9/1	TNBC		2008.3.13NE*2	1	是	1	右胸壁，锁骨上	否	0	是	NE*4
15	67	33	0	0	1	67	1	2	1	56	1	1	1	0	1	2007-11-08	2019/9	0	64	1	64	2013-04-01	luminal A	Ⅱb	2007.11.22TC*4	1	否	0		是，来曲唑5年	1
16	68	31	0	1	0	59	1	2.5	2	47	1	1	1	0	1	2007-12-11	2019/9	0	96	0	96	2019/9/1	luminal A	Ⅱa	否	0	否	0		是，不详	1
17	71	27	0	2	3	58	1	2.5	2	54	1	1	0	0	1	2006-12-07	2009-01-01	1	24	0	96	2019/9/1	luminal A	Ⅲc	2006-11-04NE	1	是	1	胸壁+ 锁骨上下	来曲唑	1	是	新辅助来曲唑（弗隆）
18	62	38	0	0	0	38	0	0.5	1	未闭经	0	0	0	0	1	2006-05-24	2019/9	0	96	0	96	2019/9/1	TNBC		2006.5.31CEF*6	1
19	66	34	0	0	1	40	0	0.5	1	未闭经	0	1	1	0	1	2007-12-28	2012-09-25	0	96	0	96	2019/9/1	luminal A		2008.1.11NE*4	1	是	1		是，不详	1	是	NE*2
20	73	27	0	0	0	54	1	2	1	51	1	0	0	0	1	2006-06-05	2019/9	0	96	0	96	2019/9/1	TNBC	Ⅱa	2006.6.9CEF	1
21	77	23	0	0	0	37	0	1.5	1	未闭经	0	1	1	0	1	2007-11-05	2019/9	0	96	0	96	2019/9/1	luminal A	Ⅰ	2007.11.13CEF*6	1
22	71	29	0	0	0	49	0	2.5	2	未闭经	0	0	1	0	1	2006-05-29	2019/9	0	96	0	96	2019/9/1	luminal A	Ⅱa	2006.6.12CEF	1
23	59	36	0	5	0	40	0	3	2	未闭经	0	0	1	0	1	2006-05-24	2019/9	0	96	0	96	2019/9/1	luminal A	Ⅱa	2006.5.30CEF*3	1						是	CEF*3
24	58	37	5	0	0	47	0	0.5	1	未闭经	0	1	1	0	1	2007-11-23	2019/9	0	96	0	96	2019/9/1	luminal A		2007.12.4CEF	1
25	52	27	21	0	0	46	0	2	1	未闭经	0	1	0	0	1	2006-05-16	2019/9	0	96	0	96	2019/9/1	luminal A	Ⅱa	2006.12.06 FAC方案3周期	1	是	1	胸壁、锁骨上	否	0	是	CEF方案4次
26	56	32	11	1	3	46	0	1	1	未闭经	0	1	1	0	1	2008-01-07	2019/9	0	96	0	96	2019/9/1	luminal A	Ⅲc	2008.01.23 CEF方案6周期	1	否	0	否	否	0	否	否
27	43	23	34	0	1	54	1	2	1	50	1	1	1	0	1	2008-01-09	2019/9	0	96	0	96	2019/9/1	luminal A	Ⅱb	2008.01.21单T方案	1	否	0	否	否	0	否	否
28	47	46	5	2	1	32	0	2	1	未闭经	0	0	0	0	1	2006-05-16	2012-03-01	1	69	0	96	2019/9/1	TNBC	Ⅱb	2006.11.23单T方案	1	是	1	胸壁、锁骨上	否	0	否	否
29	74	26	0	0	0	56	1	2.5	2	40	1	1	0	0	1	2006-05-16	2019/9	0	96	0	96	2019/9/1	luminal A	Ⅱa	否	0	否	0	否	是，弗隆口服1年之后TAM5年	1	否	否
30	71	29	0	0	0	38	0	0.3	1	未闭经	0	0	0	0	1	2008-01-03	2019/9	0	96	0	96	2019/9/1	TNBC		2008.01.14 CEF方案6周期	1	否	0	否	否	0	否	否
31	57	41	1	1	0	67	1	0.6	1	48	1	0	0	0	1	2006-05-29	2019/9	0	96	0	96	2019/9/1	TNBC	Ⅰ	否	0	否	0	否	否	0	否	否
32	55	41	0	4	0		0	2.5	2	未绝经	0	1	1	0	1	2008-01-01	2019/9	0	96	0	96	2019/9/1	luminal A				20090622	1
33	58	41	0	1	0	49	0	2.5	2	48	1	0	0	0	1	2006-06-07	2011-11-01	1	64	0	96	2019/9/1	TNBC									是	T*1
34	58	39	3	0	0	54	1	3	2	52	1	0	0	0	1	2006-06-30	2019/9	0	96	0	96	2019/9/1	TNBC	Ⅱa	2006.7.10CEF*3	1	是	1	胸壁，锁骨上，内乳	否	0	是	CEF*3
35	47	47	4	2	0	55	1	2.5	2	50	1	1	1	0	1	2007-07-13	2009-03-01	1	25	1	25	2009-09-01	luminal A		CEF方案6周期	1	否	0	否	否	0	否	否
36	59	39	0	2	0	42	0	1.5	1	未闭经	0	1	0	0	1	2007-11-16	2019/9	0	96	0	96	2019/9/1	luminal A	Ⅰ	2007.11.27CEF*1	1
37	65	29	0	6	0	59	1	2.5	2	50	1	1	0	0	1	2007-11-19	2019/9	0	96	0	96	2019/9/1	luminal A
38	69	31	0	0	0	51	1	1	1	45	1	1	1	0	1	2007-12-17	2019/9	0	96	0	96	2019-03-01	luminal A	Ⅰ	2007.12.24CEF*6	1	否	0
39	54	42	2	2	0	50	0	2.5	2	48	1	0	0	0	1	2008-05-09	2012-03-01	1	45	1	72	2014-06-01	TNBC	Ⅱa	6.25NE	1
40	53	46	0	1	1	41	0	0.5	1	未闭经	0	0	0	0	1	2007-11-19	2019/9	0	96	0	96	2019/9/1	TNBC		CEF*3	1
41	59	41	0	0	0	48	0	2.5	2	未闭经	0	1	0	0	1	2007-11-19	2019/9	0	96	0	96	2019/9/1	luminal A	Ⅱa	NE*3	1	是	1	胸壁			是	NE*2
42	58	37	0	5	0	42	0	2.5	2	未闭经	0	1	1	0	1	2006-06-20	2019/9	0	96	0	96	2019/9/1	luminal A	Ⅱa	2006.7.3CEF*6	1
43	73	27	0	0	0	50	0	2.5	2	45	1	1	1	0	1	2007-11-08	2019/9	0	96	0	96	2019/9/1	luminal A	Ⅱa	2007.11.12CEF*1	1
44	62	28	10	0	0	46	0	1.5	1	未闭经	0	0	0	0	1	2007-11-19	2012-04-01	1	52	0	96	2019/9/1	TNBC	Ⅰ	2008.1.4CEF*1	1
45	67	33	0	0	0	58	1	2	1	52	1	1	1	0	1	2007-12-16	2019/9	0	96	0	96	2019/9/1	luminal A	Ⅱa	否	0	否	0		是	1
46	48	48	0	4	2	37	0	1.5	1	未闭经	0	1	1	0	1	2008-01-16	2019/9	0	60	1	60	2013-02-01	luminal A	Ⅲa	CEF*4	1	是	1	胸壁，锁骨上	是	1	是	CEF*2
47	72	28	0	0	0	75	1	0.8	1	56	1	1	1	0	1	2006-06-30	2019/9	0	96	0	96	2019/9/1	luminal A	Ⅰ	否	0	是	1	乳腺，锁骨上，瘤床	是，弗隆	1
48	68	32	0	0	0	44	0	8	3	未闭经	0	0	0	0	1	2006-06-27	2019/9	0	96	0	96	2019/9/1	TNBC	Ⅲc	2006.7.14CEF*6	1	是	1	胸壁、锁骨上
49	68	32	0	0	0	36	0	1	1	未闭经	0	1	1	0	1	2007-12-19	2019/9	0	96	0	96	2019/9/1	luminal A		2007.12.25CEF*1	1
50	42	52	0	6	0		1	0.5	1	未绝经	0	0	0	0	1	2007-12-03	2019/9	0	96	0	96	2019/9/1	TNBC
51	67	33	0	0	0	64	1	2	1	45	1	1	1	0	1	2007-12-03	2019/9	0	96	0	96	2019/9/1	luminal A	Ⅱa	否	0	否	0		是，不详	1
52	69	31	0	0	0	67	1	3.5	2	48	1	1	1	0	1	2006-05-22	2012-06-01	0	96	0	96	2019/9/1	luminal A	Ⅱa	否	0	否	0		否	0
53	54	44	2	0	0	51	1	3.5	2	未闭经	0	0	1	0	1	2007-12-12	2019/9	0	96	0	96	2019/9/1	luminal A	Ⅱa	2007.12.12CEF*6	1	否	0		是，他莫昔芬5年	1
54	45	55	0	0	0	52	1	0.5	1	51	1	1	0	0	1	2007-12-03	2019/9	0	96	0	96	2019/9/1	luminal A		2008.1.9CEF*6	1	否	0		不详
55	73	27	0	0	1	44	0	0.5	1	未闭经	0	0	0	0	1	2006-07-04	2012-08-01	1	72	0	96	2019/9/1	TNBC		2006.11.28 CEF方案6周期	1	否	0	否	否	0	是	NE方案一次
56	61	38	0	1	0	56	1	2.5	2	50	1	1	1	0	1	2006-11-24	2019/9	0	96	0	96	2019/9/1	luminal A	Ⅱa	否	0	是	1	胸壁、锁骨上	否	0	否	否
57	73	27	0	0	0	50	0	0.8	1	未闭经	0	1	0	0	1	2006-11-10	2019/9	0	96	0	96	2019/9/1	luminal A	Ⅰ	2006.11.21 EC方案6周期	1	否	0	否	否	0	否	否
58	73	27	0	0	0	52	1	0.5	1	未闭经	0	1	1	0	1	2008-01-08	2019/9	0	96	0	96	2019/9/1	luminal A	Ⅰ	2008.03.04 CEF方案6周期	1	否	0	否	否	0	否	否
59	54	39	2	5	2	61	1	2.5	2	52	1	1	1	0	1	2009-06-16	2012-06-01	1	35	1	78	2016-01-01	luminal A	Ⅲa	7.16TEC6周期	1				来曲唑	1
60	66	33	0	1	1		1	1	1	未绝经	0	1	1	0	3	2006-09-06	2019/9	0	96	0	96	2015-01-01	luminal B	Ⅰ	TEC方案6周期	1	是	1	胸壁、锁骨上	否	0	否	否
61	57	43	0	0	0	64	1	1	1	52	1	0	0	0	3	2006-12-25	2011-01-01	1	48	0	96	2019/9/1	TNBC	Ⅰ	TEC方案6周期	1	否	0	否	否	0	否	否
62	64	34	0	2	1	58	1	1.5	1	50	1	1	1	0	1	2006-10-19	2010-05-01	1	42	0	96	2019/9/1	luminal A	Ⅱa	CEF*4	1				来曲唑（弗隆)5年	1
63	61	39	0	0	0	44	0	1.5	1	43	1	1	1	0	1	2006-09-06	2019/9	0	96	0	96	2019/9/1	luminal A	Ⅰ	CEF方案6周期	1	否	0	否	否	0	否	否
64	64	36	0	0	0	62	1	2.1	2	50	1	0	0	0	1	2008-12-30	2019/9	0	96	0	96	2019/9/1	TNBC	Ⅱa	2009.1.6FEC-T6周期	1	否	0
65	63	37	0	0	1	31	0	1.8	1	未绝经	0	1	1	0	1	2006-02-14	2019/9	0	96	0	96	2019/9/1	luminal A	Ⅱa	CEF方案6周期	1	否	0	否	否	0	否	否
66	50	48	0	2	0		0	1.5	1	未闭经	0	1	1	0	3	2006-12-04	2019/9	0	96	0	96	2019/9/1	luminal B	Ⅰ	CEF方案6周期	1	否	0	否	否	0	否	否
67	58	38	0	4	2	48	0	4	2	未闭经	0	0	0	0	3	2007-08-07	2011-04-01	1	43	1	43	2011-04-01	TNBC	Ⅱb	CEF方案6周期	1	是	1	胸壁、锁骨上	否	0	是	CEF方案二次
68	69	31	0	0	0	54	1	0.8	1	未绝经	0	0	0	0	1	2008-09-27	2019/9	0	96	0	96	2019/9/1	TNBC	Ⅰ	10.10NE3周期	1	是	1
69	50	47	0	3	1	50	0	5	2	未绝经	0	1	1	0	1	2008-01-03	2012-04-01	1	50	0	96	2019/9/1	luminal A	Ⅲa	否	0	是	1	胸壁	是，弗隆口服四年	1	否	否
70	50	47	0	3	0	65	1	2	1	48	1	1	1	0	1	2006-06-19	2019/9	0	96	0	96	2019/9/1	luminal A	Ⅱa	否	0				弗隆	1
71	47	51	0	2	0	62	1	2.5	2	55	1	0	0	0	1	2006-07-12	2019/9	0	96	0	96	2019/9/1	TNBC	Ⅱa	2006.7.27CEF*6	1
72	33	59	0	8	3	46	0	3.2	2	未闭经	0	1	1	0	1	2007-12-14	2019/9	0	96	0	96	2019/9/1	luminal A		方案不详*6	1	是	1	胸壁，锁骨上区
73	52	46	0	2	0	56	1	2.2	2	53	1	0	1	0	1	2007-11-27	2019/9	0	96	0	96	2019/9/1	luminal A	Ⅱa	2007.12.10CEF*3	1	是	1	胸壁，锁骨上			是	CEF*3
74	56	42	0	2	0	42	0	2.5	2	未闭经	0	1	1	0	1	2008-01-08	2012-04-01	1	50	0	96	2019/9/1	luminal A	Ⅱa	否	0	否	0	否	否	0	否	否
75	57	43	0	0	0	50	0	2.4	2	未绝经	0	0	0	1	2	2008-08-15	2019/9	0	96	0	96	2019/9/1	HER2过表达型	Ⅱa	8.26FEC1周期-5NP	1
76	75	25	0	0	0	47	0	3	2	未闭经	0	0	1	0	1	2007-12-03	2008/6	0	5	1	5	2008-06-01	luminal A	Ⅱa	2007.12.10 CEF方案6周期	1	是	1	胸壁、锁骨上	否	0	否	否
77	51	47	0	2	1	45	0	2	1	未闭经	0	1	1	0	1	2007-11-05	2012-03-01	1	51	0	96	2019/9/1	luminal A	Ⅱb	2007.11.26CEF*6	1	是	1	胸壁	否	0
78	71	29	0	0	0	66	1	1.5	1	50	1	1	1	0	1	2006-12-22	2019/9	0	96	0	96	2019/9/1	luminal A	Ⅰ	否	0	否	0	否	是，弗隆口服四年	1	否	否
79	62	38	0	0	0	44	0	2.5	2	44	1	0	0	0	1	2006-06-21	2019/9	0	96	0	96	2019/9/1	TNBC	Ⅱa	CEF*6	1	是	1	乳腺，锁骨上，瘤床
80	62	36	0	2	0	43	0	1.5	1	42岁子宫切除	1	0	0	0	3	2008-07-11	2019/9	0	96	0	96	2019/9/1	TNBC	Ⅰ	7.18FEC	1	否	0
81	71	29	0	0	1	41	0	3	2	未绝经	0	0	0	0	3	2008-09-16	2019/9	0	96	0	96	2019/9/1	TNBC	Ⅱb	9.26NE	1	否	0
82	52	47	0	1	0		1	0.5	1	未绝经	0	0	0	0	1	2006-06-21	2019/9	0	96	0	96	2019/9/1	TNBC
83	74	26	0	0	0	53	1	1.5	1	53	1	1	1	0	1	2006-07-12	2019/9	0	96	0	96	2019/9/1	luminal A	Ⅰ						弗隆	1
84	54	44	0	2	0	52	1	0.5	1	52	1	1	1	0	1	2007-11-09	2019/9	0	96	0	96	2019/9/1	luminal A
85	53	47	0	0	1	55	1	0.5	1	50	1	1	1	0	1	2007-12-10	2019/9	0	96	0	96	2019/9/1	luminal A		2007.12.17CEF*6	1	是	1	胸壁，锁骨上
86	43	56	0	1	1		0	0.6	1	未绝经	0	1	1	1	3	2006-06-21	2019/9	0	96	0	96	2019/9/1	Her2过表达型
87	69	31	0	0	0	79	1	0.8	1	45	1	1	1	0	3	2006-07-05	2013-01-01	1	77	1	94	2014-06-01	luminal B	Ⅰ	否	0	否	0		弗隆2年	1
88	53	46	0	1	1	79	1	1	1	52	1	1	1	0	1	2006-06-21	2019/9	0	96	0	96	2019/9/1	luminal A	Ⅱa	否	0	是	1	乳腺，锁骨上，瘤床	弗隆	1
89	45	49	2	4	1	57	1	2.2	2	50	1	0	0	1	1	2007-07-02	2019/9	0	96	0	96	2019/9/1	HER2过表达型	Ⅱb	7.13FEC6周期	1
90	43	55	0	2	0	46	0	2.5	2	未闭经	0	1	1	0	1	2007-11-28	2012-03-01	1	51	0	96	2019/9/1	luminal A		2007.12.07CEF*6	1	是	1	乳腺，瘤床
91	44	51	0	5	1		1	0.5	1	未闭经	0	1	1	0	1	2007-12-10	2019/9	0	96	0	96	2019/9/1	luminal A		2007.12.17CEF*6	1	是	1	胸壁	弗隆5年	1
92	72	28	0	0	0		0	0.5	1	未绝经	0	0	0	0	1	2006-06-16	2019/9	0	96	0	96	2019/9/1	TNBC
93	42	31	27	0	0	29	0	1	1	未闭经	0	0	0	0	1	2006-06-16	2019/9	0	96	0	96	2019/9/1	TNBC	Ⅰ	CEF*2	1	是	1	乳腺，内乳，锁骨上，瘤床	否	0	是	CEF*4(PR）
94	53	44	0	3	0	42	0	1	1	未闭经	0	1	1	0	1	2008-01-03	2010-05-01	1	51	0	96	2019/9/1	luminal A	Ⅰ	NE方案6周期	1	是	1	胸壁、锁骨上	否	0	否	否
95	67	33	0	0	0	66	1	2	1	49	1	0	0	0	1	2006-07-11	2019/9	0	96	0	96	2019/9/1	TNBC	Ⅱa	2006.7.21CEF	1
96	53	46	0	1	1	51	1	1.3	1	47	1	1	1	0	1	2006-07-06	2011-01-01	1	53	0	96	2019/9/1	luminal A	Ⅱa	2006.7.19NE*1，NP*5	1	是	1	胸壁
97	56	40	0	4	0	52	1	0.5	1	50	1	0	0	0	1	2007-12-04	2019/9	0	96	0	96	2019/9/1	TNBC		2007.12.7CEF	1
98	63	34	3	0	0	48	0	0.5	1	未闭经	0	1	1	0	1	2007-12-28	2019/9	0	96	0	96	2019/9/1	luminal A
99	55	45	0	0	0	36	0	1.2	1	未闭经	0	1	1	0	1	2006-05-31	2019/9	0	96	0	96	2019/9/1	luminal A	Ⅰ	2006.8.8CEF	1
100	53	47	0	0	0	64	1	5	2	46	1	1	1	0	1	2007-11-23	2019/9	0	96	0	96	2019/9/1	luminal A	Ⅱb	2007.12.5CEF*6	1
101	55	40	5	0	0	56	1	1.5	1	45	1	1	1	0	1	2006-05-31	2011-01-01	0	49	1	49	2010-07-01	luminal A	Ⅰ	否	0	否	0		否	0
102	50	50	0	0	0	65	1	1	1	53	1	1	1	0	1	2006-05-22	2019/9	0	96	0	96	2019/9/1	luminal A	Ⅰ
103	53	47	0	0	3	61	1	2	1	55	1	1	1	0	1	2006-06-12	2019/9	0	96	0	96	2019/9/1	luminal A	Ⅲa	2006.6.25NE*6	1	是	1	胸壁，锁骨上
104	62	38	0	0	1	44	0	2	1	未闭经	0	0	0	0	1	2006-05-30	2019/9	0	96	0	96	2019/9/1	TNBC	Ⅱb
105	73	27	0	0	1	60	1	1	1	53	1	1	1	0	1	2007-11-30	2019/9	0	96	0	96	2019/9/1	luminal A	Ⅱa
106	69	25	6	0	0	50	0	3.5	2	未闭经	0	1	1	0	1	2006-11-10	2019/9	0	96	0	96	2019/9/1	luminal A	Ⅱa	2006.11.16 CEF方案6周期	1	否	0	否	否	0	否	否
107	58	40	0	2	0	44	0	3	2	未绝经	0	0	0	0	2	2009-11-19	2014-06-01	1	54	0	96	2019/9/1	TNBC	Ⅱa	12.24TP6周期	1	是	1
108	49	47	0	4	0	39	0	2	1	未绝经	0	0	0	0	3	2009-02-06	2016-02-01	1	83	0	96	2017-09-01	TNBC	Ⅱa	4.21NE5周期	1	是	1				是	1FEC
109	53	44	1	2	2	53	1	0.5	1	47	1	0	0	0	1	2006-11-17	2011-03-01	1	51	0	96	2019/9/1	TNBC		2006.11.30 CEF方案6周期	1	是	1	胸壁、锁骨上	否	0	否	否
110	58	37	0	5	0	41	0	3.5	2	未闭经	0	1	1	0	1	2008-01-04	2010-08-01	0	96	0	96	2019/9/1	luminal A	Ⅱa	2008.01.16 CEF方案6周期	1	否	0	否	否	0	否	否
111	76	24	0	0	2	51	1	2.5	2	48	1	0	0	0	1	2008-03-06	2019/9	0	96	0	96	2019/9/1	TNBC	Ⅲa	2008.03.24 NE方案6周期	1	是	1	胸壁、锁骨上	否	0	否	否
112	56	44	0	0	0	40	0	1	1	未绝经	0	1	1	0	1	2008-04-30	2012-10-01	1	53	0	96	2019/9/1	luminal A	Ⅰ	5.6FAC6周期	1
113	52	36	8	4	1	43	0	1	1	未闭经	0	0	0	0	1	2006-04-07	2011-01-01	1	56	0	96	2014-06-01	TNBC	Ⅱa	2006.04.20 CEF方案6周期	1	是	1	胸壁、锁骨上	否	0	否	否
114	80	20	0	0	0	38	0	2	1	未闭经	0	0	0	0	1	2006-11-10	2019/9	0	96	0	96	2019/9/1	TNBC	Ⅲc	2006.12.17 CEF方案6周期	1	否	0	否	否	0	否	否
115	68	32	0	0	0	50	0	0.5	1	未闭经	0	1	1	0	1	2006-11-17	2019/9	0	96	0	96	2019/9/1	luminal A	Ⅰ	2006.12.27 CEF方案5周期	1	否	0	否	否	0	否	否
116	67	31	0	2	0	57	1	2.3	2	45	1	0	0	0	2	2008-07-29	2019/9	0	96	0	96	2019/9/1	TNBC	Ⅱa	8.25FEC1周期	1	否	0
117	69	31	0	0	0	54	1	1.5	1	50	1	1	0	0	1	2006-11-28	2019/9	0	96	0	96	2019/9/1	luminal A	Ⅰ	2006.12.04 CEF方案6周期	1	否	0	否	否	0	否	否
118	27	41	27	5	0	50	0	2	1	未绝经	0	0	1	1	1	2007-08-13	2019/9	0	96	0	96	2019/9/1	HER2过表达型	Ⅱa	8.21FEC6周期	1	无	0		无	0
119	43	53	3	1	0	38	0	3	2	未闭经	0	0	0	0	1	2006-12-11	2011-01-01	1	36	0	96	2019/9/1	TNBC	Ⅱa	CEF方案6周期	1	是	1	胸壁、锁骨上	否	0	否	否
120	73	27	0	0	0	47	0	2	1	未闭经	0	0	0	0	1	2006-09-08	2012-04-01	1	66	0	96	2019/9/1	TNBC	Ⅱa	CEF方案6周期	1	否	0	否	否	0	否	否
121	37	53	0	10	2	66	1	2.5	2	52	1	1	1	0	1	2007-07-19	2009-10-01	0	67	0	96	2019/9/1	luminal A		是，方案不详	1	是	1	胸壁、锁骨上	是、具体药物和时间不详待随访	1	是	单T方案二次
122	67	33	0	0	0	50	0	1.5	1	未闭经	0	1	0	0	1	2006-09-08	2019/9	0	96	0	96	2019/9/1	luminal A	Ⅰ	CEF方案6周期	1	否	0	否	否	0	否	否
123	64	29	7	0	0	36	0	1.5	1	未闭经	0	0	0	0	1	2006-12-01	2019/9	0	96	0	96	2019/9/1	TNBC	Ⅰ	CEF方案6周期	1	否	0	否	否	0	否	否
124	49	46	0	5	0	50	0	3.2	2	未闭经	0	1	1	0	1	2007-11-15	2012-03-01	1	51	0	96	2019/9/1	luminal A		2007.11.28CEF	1
125	71	29	0	0	0	45	0	2.5	2	未闭经	0	1	1	0	1	2006-10-29	2019/9	0	96	0	96	2018-12-01	luminal A	Ⅱa	CEF方案6周期	1	是	1	胸壁、锁骨上	否	0	否	否
126	73	27	0	0	0	50	0	1.5	1	未闭经	0	0	0	0	1	2006-12-08	2019/9	0	96	0	96	2019/9/1	TNBC	Ⅰ	CEF方案6周期	1	否	0	否	否	0	否	否
127	75	25	0	0	0	49	0	7	3	未闭经	0	0	0	0	1	2007-07-09	2010-09-01	1	37	1	51	2011-10-09	TNBC	Ⅱa	2007.7.20CEF	1	不详		不详	不详		否
128	69	31	0	0	0	54	1	1.5	1	49	1	0	0	0	3	2006-10-13	2019/9	0	96	0	96	2019/9/1	TNBC	Ⅰ	否	0	不详		不详	不详		是	CEF*6
129	65	34	0	1	0	48	0	2	1	未闭经	0	0	0	0	1	2006-10-13	2019/9	0	96	0	96	2019/9/1	TNBC	Ⅱa								是	CEF
130	39	59	0	2	1	51	1	3.5	2	未闭经	0	0	0	0	1	2006-10-27	2012-02-01	1	63	0	96	2019/9/1	TNBC	Ⅱb	2006-11-07NE	1	是	1	胸壁+ 锁骨上下			是	NE*2
131	71	29	0	0	0	35	0	0.8	1	未闭经	0	1	1	0	1	2007-11-13	2019/9	0	96	0	96	2019/9/1	luminal A		2007.11.30CEF*1	1
132	73	27	0	0	1	48	0	1.5	1	未闭经	0	1	1	0	1	2008-01-04	2019/9	0	96	0	96	2019/9/1	luminal A	Ⅱa	2008.01.10单T方案	1	否	0	否	否	0	否	否
133	65	33	0	2	2	55	1	2.5	2	43	1	0	0	0	3	2008-07-11	2015/4	0	80	1	80	2015-04-01	TNBC	Ⅱb	7.29TEC6周期	1	是	1
134	52	46	0	2	1	39	0	2	1	未绝经	0	1	0	0	1	2006-07-12	2012-06-01	1	53	0	96	2015-01-01	luminal A	Ⅱb	T*4序贯E*1	1	否	0		否	0
135	71	29	0	0	0	44	0	4	2	未闭经	0	0	0	0	1	2006-12-07	2019/9	0	96	0	96	2019/9/1	TNBC	Ⅱa	2006-12-8CEF	1	是	1	胸壁+ 锁骨上下
136	61	39	0	0	0	50	0	2.1	2	未绝经	0	0	0	0	3	2008-12-23	2015-06-01	1	77	0	96	2019/9/1	TNBC	Ⅱa	2009.1.5NE6周期	1	否	0		来曲唑	1
137	70	30	0	0	1	38	0	3.9	2	未闭经	0	1	1	0	1	2007-11-28	2019/9	0	96	0	96	2019/9/1	luminal A		2007.12.9T序贯EC	1	是	1	胸壁，锁骨上
138	65	35	0	0	0	47	0	2	1	未闭经	0	1	1	0	1	2007-12-25	2019/9	0	96	0	96	2019/9/1	luminal A	Ⅱa	2008.1.3CEF	1
139	73	27	0	0	0	41	0	0.5	1	未闭经	0	0	0	0	1	2008-04-09	2019/9	0	17	1	17	2009-10-01	TNBC		TEC*1	1						是	TEC*5
140	45	52	1	2	0	72	1	4	2	58	1	1	0	0	1	2006-06-05	2011-01-01	1	54	0	96	2019/9/1	luminal A	Ⅱa	否	0	是	1	胸壁	是，弗隆，时长不详	1
141	61	39	0	0	0	49	0	0.3	1	未闭经	0	0	0	0	1	2006-07-19	2012-09-16	1	73	0	96	2019/9/1	TNBC		2006.8.1CEF	1				否	0
142	58	40	0	2	0	56	1	3	2	50	1	0	1	0	1	2007-11-20	2012-06-01	1	54	0	96	2019/9/1	luminal A	Ⅱa	2007.11.29 CEF方案6周期	1	否	0	否	否	0	否	否
143	69	31	0	0	0	49	0	2.5	2	未闭经	0	0	0	0	1	2007-11-27	2011-01-01	1	37	0	96	2019/9/1	TNBC		2007.12.4CEF	1				否	0
144	60	36	4	0	0	45	0	0.5	1	未闭经	0	1	1	0	1	2007-12-19	2019/9	0	96	0	96	2019/9/1	luminal A		2008.1.3CEF	1
145	42	53	4	1	3	51	1	1	1	47	1	1	0	0	1	2006-07-07	2011-03-01	1	55	0	96	2019/9/1	luminal A	Ⅲc	2006.7.13CAF	1
146	62	38	0	0	0	64	1	2.5	2	55	1	1	1	1	1	2009-06-12	2019/9	0	96	0	96	2019/9/1	HER2过表达型	Ⅱa			否	0		内分泌药物 4年	1
147	65	35	0	0	0	47	0	3	2	未闭经	0	1	1	0	1	2007-12-05	2019/9	0	96	0	96	2019/9/1	luminal A	Ⅱa	2007.12.12CEF	1
148	54	45	1	0	0	35	0	1.5	1	未闭经	0	1	1	0	1	2006-04-14	2019/9	0	96	0	96	2019/9/1	luminal A	Ⅰ	2006.4.25NE	1	不详			否	0
149	47	51	0	2	2	31	0	2.5	2	未绝经	0	0	0	0	1	2006-06-28	2012-04-01	1	69	0	96	2019/9/1	TNBC	Ⅲa	2006.7.4CEF	1
150	27	67	4	2	1	50	0	1.5	1	50	1	1	0	0	1	2007-12-25	2019/9	0	96	0	96	2019/9/1	luminal A	Ⅱa	2009.1.3NE*6	1
151	56	39	5	0	0	38	0	3	2	未闭经	0	0	0	0	1	2006-07-16	2019/9	0	90	1	90	2014-02-01	TNBC	Ⅱa
152	54	44	2	0	0	48	0	1.5	1	未闭经	0	0	0	0	1	2006-06-02	2019/9	0	96	0	96	2019/9/1	TNBC	Ⅰ	2006.6.9CEF	1
153	59	34	7	0	1	46	0	1.5	1	未闭经	0	1	1	0	1	2006-04-14	2019/9	0	96	0	96	2019/9/1	luminal A	Ⅱa	2006.4.28CEF*6	1
154	45	48	5	2	0	51	1	3.5	2	未闭经	0	0	0	0	1	2006-05-31	2019/9	0	96	0	96	2019/9/1	TNBC	Ⅱa	2006.4.28CEF*6	1	否	0
155	43	52	3	2	1	38	0	0.5	1	未闭经	0	0	1	0	1	2006-07-11	2019/9	0	96	0	96	2017-04-01	luminal A		2006.7.18CEF	1	是	1	胸壁，锁骨上	是	1
156	62	38	0	0	0	45	0	1	1	未绝经	0	0	0	0	3	2008-08-05	2019/9	0	96	0	96	2019/9/1	TNBC	Ⅰ	8.15NP3周期	1	是	1
157	73	27	0	0	1	44	0	1.5	1	未闭经	0	0	0	0	1	2006-07-03	2019/9	0	96	0	96	2019/9/1	TNBC	Ⅱa
158	47	47	1	5	1	44	0	1.2	1	未闭经	0	1	1	0	1	2006-04-19	2019/9	0	96	0	96	2019/9/1	luminal A	Ⅱa	2006.04.29CEF方案	1	否	0	否	未	0	未	未
159	52	46	0	2	0	65	1	3	2	36岁子宫切除	1	1	1	0	1	2009-08-03	2014-03-01	1	54	0	96	2019/9/1	luminal A	Ⅱa	8.30TC3周期	1				他莫昔芬1年半改为来曲唑	1
160	57	41	0	2	1	58	1	2	1	49	1	1	1	0	1	2007-12-11	2012-09-01	1	56	0	96	2019/9/1	luminal A	Ⅱb	否	0	否	0	否	弗隆口服四年	1	未	未
161	69	31	0	0	0	44	0	4	2	未闭经	0	1	1	0	1	2006-05-22	2019/9	0	96	0	96	2019/9/1	luminal A	Ⅱa	2006.05.30CEF方案	1	否	0	否	否	0	否	否
162	38	43	17	2	0	42	0	1.8	1	未闭经	0	1	1	0	1	2006-11-08	2011-08-01	1	56	0	96	2019/9/1	luminal A	Ⅰ	CEF方案6周期	1	否	0	否	否	0	否	否
163	70	30	0	0	1	44	0	2.5	2	未闭经	0	1	1	0	1	2008-01-08	2019/9	0	96	0	96	2019/9/1	luminal A	Ⅱb	否	0	否	0	否	否	0	否	否
164	52	44	0	4	2	42	0	3	2	未闭经	0	0	1	0	1	2006-05-15	2019/9	0	96	0	96	2019/9/1	luminal A	Ⅲa	2006.05.25 NE方案4周期	1	否	0	否	否	0	否	否
165	54	33	12	1	0	50	0	4	2	49	1	0	0	0	1	2007-11-27	2019/9	0	96	0	96	2019/9/1	TNBC	Ⅱa	2007.12.07 CEF方案6周期	1	否	0	否	否	0	否	否
166	69	31	0	0	0	43	0	1.5	1	未闭经	0	1	1	0	1	2006-11-13	2019/9	0	96	0	96	2019/9/1	luminal A	Ⅰ	2006.11.21 CEF方案6周期	1	是	1	胸壁、锁骨上	否	0	否	否
167	71	29	0	0	0	60	1	3	2	54	1	1	1	0	1	2006-04-27	2019/9	0	96	0	96	2019/9/1	luminal A	Ⅱa	2006.09.10 CEF方案6周期	1	否	0	否	否	0	否	否
168	57	39	0	4	0	50	0	4	2	未闭经	0	1	0	0	1	2006-07-21	2011-05-01	1	57	0	96	2019/9/1	luminal A	Ⅱa	2006.5.26CEF*3	1	是	1	胸壁
169	71	29	0	0	0	52	1	1.6	1	未闭经	0	0	0	0	1	2006-11-03	2019/9	0	96	0	96	2019/9/1	TNBC	Ⅰ	2006.11.09 CEF方案6周期	1	是	1	胸壁、锁骨上	否	0	否	否
170	67	30	2	1	2	48	0	1	1	未闭经	0	1	1	0	1	2006-11-20	2019/9	0	96	0	96	2019/9/1	luminal A	Ⅱa	否	0	否	0	否	否	0	否	否
171	59	39	2	0	0	65	1	1	1	54	1	1	1	0	1	2007-12-27	2019/9	0	96	0	96	2019/9/1	luminal A	Ⅰ	否	0	否	0	否	是，弗隆口服四年	1	否	否
172	47	53	0	0	0	55	1	2	1	42	1	1	1	0	3	2006-05-12	2019/9	0	96	0	96	2019/9/1	luminal B	Ⅱa	否	0	否	0	否	是，弗隆口服四年	1	否	否
173	57	43	0	0	0	51	1	3.5	2	未闭经	0	0	1	0	1	2006-06-09	2019/9	0	96	0	96	2019/9/1	luminal A	Ⅱa	2006.06.20 CEF方案6周期	1	否	0	否	否	0	否	否
174	73	27	0	0	0	49	0	0.5	1	未闭经	0	0	0	0	1	2006-11-28	2019/9	0	96	0	96	2019/9/1	TNBC		2006-12-8CEF	1						是	NE*2
175	75	25	0	0	3	43	0	4	2	未闭经	0	0	0	0	1	2007-05-18	2019/9	0	96	0	96	2019/9/1	TNBC	Ⅲc	2007-5-25CEF	1	是	1	术前放疗（乳腺及锁骨上下）			是	CEF*4
176	51	42	4	3	0	50	0	2	1	未闭经	0	1	1	0	1	2006-06-27	2011-07-01	1	60	0	96	2019/9/1	luminal A	Ⅱa
177	52	40	0	8	1	52	1	1.8	1	48	1	0	0	0	3	2008-06-24	2013-01-01	1	54	0	96	2019/9/1	TNBC	Ⅱa	7.7FEC6周期	1
178	58	40	0	2	0	51	1	4.2	2	未绝经	0	0	0	0	1	2009-08-19	2016-03-01	1	78	1	89	2017-02-01	TNBC	Ⅱa	8.28FEC	1	无	0				是	2FEC-1TEC
179	53	38	9	0	1	40	0	3	2	未绝经	0	0	0	1	1	2008-11-14	2019/9	0	96	0	96	2019/9/1	HER2过表达型	Ⅱb	11.24TEC6周期	1	是	1		无	0
180	65	35	0	0	0	52	1	2.3	2	53	1	0	0	0	3	2009-09-01	2019/9	0	96	0	96	2019/9/1	TNBC	Ⅱa	9.14TP3周期	1	否	0
181	55	40	0	5	1	70	1	1.8	1	53	1	0	0	0	2	2009-04-27	2010-07-01	1	14	0	96	2019/9/1	TNBC	Ⅱa	5.8TC	1	无	0
182	57	41	0	2	2	60	1	3	2	57	1	0	0	0	1	2009-08-19	2019/9	0	96	0	96	2019/9/1	TNBC	Ⅱb	8.28FEC6周期	1	是	1
183	69	31	0	0	2	57	1	2.8	2	47	1	1	1	1	1	2008-09-12	2019/9	0	96	0	96	2019/9/1	HER2过表达型	Ⅲa	9.22FEC6周期	1	是	1		来曲唑5年	1
184	45	44	8	3	0	74	1	4	2	49	1	0	0	1	1	2009-02-27	2011-07-01	1	28	1	51	2013-06-01	HER2过表达型	Ⅱa	无	0	无	0		无	0	无
185	53	36	5	6	0	48	0	2.8	2	未绝经	0	1	1	1	1	2009-09-11	2019/9	0	96	0	96	2019/9/1	HER2过表达型	Ⅱa	9.21TEC4周期	1	是	1		内分泌药物3年	1
186	63	37	0	0	1	47	0	2	1	未绝经	0	1	1	1	3	2008-11-03	2019/9	0	96	0	96	2019/9/1	HER2过表达型	Ⅱb	11.12FEC6周期	1	无	0		无	0
187	75	25	0	0	0	71	1	2	1	54	1	1	1	0	1	2007-11-26	2019/9	0	96	0	96	2019/9/1	luminal A	Ⅱa	否	0	否	0		弗隆，时间不详	1
188	59	41	0	0	0	38	0	3.5	2	未闭经	0	0	0	0	1	2006-07-14	2019/9	0	96	0	96	2019/9/1	TNBC	Ⅱa	2006.7.19NE*6	1	是	1	胸壁，锁骨上
189	66	34	0	0	1	46	0	0.5	1	未闭经	0	0	0	0	1	2007-12-21	2019/9	0	96	0	96	2019/9/1	TNBC
190	63	37	0	0	0	40	0	0.5	1	未闭经	0	0	0	0	1	2008-01-02	2019/9	0	96	0	96	2019/9/1	TNBC		2008.1.11EC方案	1	否	0	否	否	0	否	否
191	45	54	1	0	0		0	0.5	1	未绝经	0	0	0	0	1	2006-05-31	2019/9	0	96	0	96	2019/9/1	TNBC
192	64	36	0	0	0	56	1	1	1	49	1	0	0	0	1	2009-08-11	2019/9	0	96	0	96	2019/9/1	TNBC	Ⅰ			是	1
193	64	36	0	0	0	43	0	3.5	2	未绝经	0	0	0	0	1	2006-04-27	2019/9	0	96	0	96	2019/9/1	TNBC	Ⅱa	2007.11.29 CEF方案6周期	1	否	0	否	否	0	是	NE方案二次
194	65	35	0	0	0	50	0	2.3	2	49	1	0	0	0	1	2006-04-27	2019/9	0	96	0	96	2019/9/1	TNBC	Ⅱa	2006.12.04 CEF方案6周期	1	否	0	否	否	0	否	否
195	53	45	0	2	0	62	1	2.3	2	52	1	0	0	0	3	2008-11-18	2015-06-01	1	78	1	84	2015-12-01	TNBC	Ⅱa	11.28FEC	1	否	0
196	54	37	9	0	1	29	0	5	2	未绝经	0	1	1	1	1	2009-09-04	2016/9	0	83	1	83	2016-09-01	HER2过表达型	Ⅲa	9.11TEC3周期	1	是	1		内分泌药物5年	1
197	46	48	0	6	2	57	1	3	2	50	1	1	1	0	1	2007-10-27	2010-07-01	0	32	0	96	2019/9/1	luminal A	Ⅱb	2007-11-5CEF	1	是	1	胸壁+ 锁骨上下
198	55	45	0	0	2	73	1	2.5	2	50	1	1	0	0	1	2006-10-30	2019/9	0	96	0	96	2019/9/1	luminal A	Ⅲa								是	来曲唑（弗隆)
199	64	36	0	0	0	28	0	2.5	2	未绝经	0	0	0	0	2	2008-04-15	2009-01-01	1	8	1	13	2009-06-01	TNBC	Ⅱa	4.21FEC	1
200	59	41	0	0	2	49	0	3	2	未绝经	0	1	0	1	2	2007-06-12	2019/9	0	96	0	96	2019/9/1	HER2过表达型	Ⅲa	6.17FEC6周期	1	是	1		来曲唑5年	1
201	46	52	0	2	1	53	1	2.5	2	51	1	0	0	0	1	2009-04-23	2014-06-01	1	61	0	96	2019/9/1	TNBC	Ⅱb	5.20TP6周期	1	是	1
202	38	48	9	5	3	54	1	1.3	1	53	1	0	0	1	1	2009-04-22	2015-03-01	1	70	1	73	2015-06-01	HER2过表达型	Ⅲa	5.7FEC2周期	1	是	1		无	0
203	61	36	3	0	0	66	1	3	2	38	1	1	0	1	2	2007-03-23	2019/9	0	96	0	96	2019/9/1	HER2过表达型	Ⅱa			无	0		他莫昔芬3年	1
204	51	33	16	0	0	62	1	2	1	53	1	0	0	1	1	2008-07-15	2019/9	0	96	0	96	2019/9/1	HER2过表达型		7.21FEC	1	无	0		无	0	是	FEC
205	38	47	9	6	0	59	1	2.1	2	53	1	0	0	1	1	2009-09-04	2019/9	0	96	0	96	2019/9/1	HER2过表达型	Ⅱa	9.27NE6周期	1	否	0		内分泌药物8年	1
206	58	39	3	0	0	44	0	2.5	2	未绝经	0	0	0	0	2	2008-01-18	2019/9	0	96	0	96	2019/9/1	TNBC	Ⅱa	1.24FEC6周期	1	是	1
207	75	25	0	0	0	62	1	3	2	48	1	0	1	1	1	2007-04-28	2019/9	0	96	0	96	2019/9/1	HER2过表达型	Ⅱa	5.14FEC	1	无	0		他莫昔芬5年	1
208	36	52	7	5	1	43	0	3	2	未闭经	0	1	1	0	1	2006-06-13	2019/9	0	96	0	96	2019/9/1	luminal A	Ⅱb	2006.6.21CEF	1
209	61	39	0	0	2	50	0	1.5	1	未闭经	0	1	0	0	1	2006-07-07	2019/9	0	36	1	36	2009-08-01	luminal A	Ⅲa
210	59	41	0	0	0	47	0	1.5	1	未闭经	0	1	1	0	1	2007-12-03	2012-07-01	0	96	0	96	2019/9/1	luminal A	Ⅰ	2007.12.13NE*6	1
211	75	25	0	0	1	55	1	3.3	2	53	1	0	0	1	1	2008-11-14	2019/9	0	96	0	96	2019/9/1	HER2过表达型	Ⅱb	11.26NP2周期	1	是	1		无	0
212	45	50	3	2	1	33	0	3.5	2	未闭经	0	0	0	0	1	2006-04-19	2012-07-01	1	74	0	96	2019/9/1	TNBC	Ⅱb	2006.04.23CEF方案	1	是	1	胸壁、锁骨上、内乳	否	0	否	否
213	36	51	9	4	0	58	1	3	2	51	1	1	0	1	1	2008-06-23	2019/9	0	96	0	96	2019/9/1	HER2过表达型	Ⅱa	7.3FEC	1	无	0		无	0
214	49	49	2	0	0	58	1	1	1	49	1	1	1	0	1	2006-07-25	2019/9	0	96	0	96	2019/9/1	luminal A	Ⅰ	否	0	否	0	否	是、具体药物和时间不详待随访	1	否	否
215	54	46	0	0	2	32	0	0.5	1	未绝经	0	0	1	0	1	2007-12-05	2019/9	0	96	0	96	2019/9/1	luminal A		2007.12.13 TEC方案四周期	1	是	1	胸壁、腋窝	否	0	是	CEF方案一周期
216	58	35	7	0	0	52	1	0.8	1	51	1	0	0	0	1	2006-05-22	2019/9	0	96	0	96	2019/9/1	TNBC	Ⅰ	否	0	是	1	胸壁	否	0	否	否
217	56	36	2	6	1	50	0	0.7	1	38	1	1	1	0	1	2006-06-15	2019/9	0	96	0	96	2019/9/1	luminal A	Ⅱa	2006.06.28单T方案	1	是	1	乳腺切线野、锁骨上、瘤床区	是、具体药物和时间不详待随访	1	否	否
218	57	43	0	0	0	53	1	1.5	1	45	1	1	1	0	1	2006-04-17	2015/6	0	96	0	96	2015-06-01	luminal A	Ⅰ	2006.04.29 CEF方案6周期	1	否	0	否	否	0	否	否
219	73	22	5	0	0	44	0	0.5	1	未闭经	0	0	1	0	1	2007-12-14	2019/9	0	96	0	96	2019/9/1	luminal A		2007.12.27 CEF方案6周期	1	是	1	右侧胸壁	否	0	否	否
220	39	61	0	0	1	52	1	2.4	2	未闭经	0	1	1	0	1	2006-04-24	2019/9	0	96	0	96	2019/9/1	luminal A	Ⅱb	2006.09.13 CEF方案6周期	1	否	0	否	否	0	否	否
221	61	39	0	0	0	49	0	2.3	2	48	1	0	0	0	3	2008-12-10	2019/9	0	96	0	96	2019/9/1	TNBC	Ⅱa	12.22FEC	1	否	0
222	66	34	0	0	0	65	1	1.8	1	55	1	0	0	0	3	2009-10-30	2019/9	0	96	0	96	2019/9/1	TNBC	Ⅰ			是	1
223	55	45	0	0	0	39	0	2.5	2	未闭经	0	1	1	1	3	2006-04-11	2009-08-01	1	39	0	96	2019/9/1	HER2过表达型		2006.04.21 CEF方案6周期	1	否	0	否	否	0	否	否
224	72	28	0	0	0	49	0	1.5	1	未闭经	0	0	0	0	1	2006-04-24	2019/9	0	96	0	96	2019/9/1	TNBC	Ⅰ	2006.11.13 CEF方案6周期	1	是	1	胸壁、锁骨上	否	0	否	否
225	54	46	0	0	0	40	0	1.2	1	未闭经	0	1	1	0	1	2006-11-21	2012-04-01	1	64	0	96	2019/9/1	luminal A	Ⅰ	2006.11.28 CEF方案6周期	1	否	0	否	否	0	否	否
226	61	37	2	0	2	53	1	2.5	2	52	1	0	0	0	1	2006-11-06	2019/9	0	96	0	96	2019/9/1	TNBC	Ⅲa	CEF方案6周期	1	否	0	否	否	0	是	NE方案二次
227	17	44	37	2	2	47	0	2.8	2	未绝经	0	1	1	1	1	2008-11-21	2013-05-01	1	53	1	72	2014-12-01	HER2过表达型	Ⅲc	12.3NE3周期	1	是	1		他莫昔芬3年	1
228	50	45	5	0	0	61	1	0.5	1	50	1	1	1	0	1	2006-11-14	2012-05-01	1	65	0	96	2019/9/1	luminal A	Ⅰ	否	0	否	0	否	是，弗隆口服二年	1	否	否
229	59	41	0	0	0	64	1	1.2	1	46	1	1	1	0	1	2006-07-06	2012-02-01	1	66	0	96	2019/9/1	luminal A	Ⅰ
230	61	39	0	0	0	42	0	0.5	1	未闭经	0	1	1	0	1	2007-12-28	2019/9	0	96	0	96	2019/9/1	luminal A		CEF方案6周期	1	是	1	胸壁、锁骨上	否	0	否	否
231	71	29	0	0	0	41	0	2	1	未闭经	0	1	1	0	3	2006-05-24	2019/9	0	96	0	96	2019/9/1	luminal B	Ⅱa	CEF方案6周期	1	否	0	否	否	0	否	否
232	67	33	0	0	0	54	1	2.5	2	未绝经	0	0	0	0	3	2009-09-29	2019/9	0	96	0	96	2019/9/1	TNBC	Ⅱa	10.12TP6周期	1	否	0
233	9	41	50	0	0	44	0	2.2	2	未绝经	0	1	0	1	1	2007-10-11	2014-12-01	1	85	0	96	2017-03-01	HER2过表达型	Ⅱa	10.23FEC6周期	1	是	1		他莫昔芬5年	1
234	72	28	0	0	0	50	0	1.5	1	未闭经	0	0	0	0	1	2006-12-08	2019/9	0	96	0	96	2019/9/1	TNBC	Ⅰ	2006-12-15 CEF*6	1
235	62	33	5	0	1	51	1	5	2	51	1	0	0	0	3	2009-08-20	2019/9	0	96	0	96	2019/9/1	TNBC	Ⅲa	9.9NE2周期	1	是	1				是	4NE
236	66	30	0	4	0	56	1	2	1	54	1	0	0	0	1	2008-05-16	2012-05-01	1	47	0	96	2019/9/1	TNBC	Ⅱa	2007-10-10CEF	1
237	69	31	0	0	0	37	0	2.5	2	未绝经	0	0	0	0	1	2008-10-24	2019/9	0	96	0	96	2019/9/1	TNBC	Ⅱa	11.5FEC3周期	1	否	0
238	22	29	47	2	0	31	0	2	1	未绝经	0	0	1	1	1	2009-06-03	2019/9	0	96	0	96	2019/9/1	HER2过表达型	Ⅱa	6.15TEC	1	无	0		无	0
239	60	36	4	0	0	44	0	2.1	2	未绝经	0	0	0	0	3	2009-11-06	2019/9	0	96	0	96	2019/9/1	TNBC	Ⅱa	12.9NE6周期	1	否	0
240	61	39	0	0	0	49	0	3.5	2	48	1	0	0	0	3	2009-09-08	2019/9	0	96	0	96	2019/9/1	TNBC	Ⅱa	9.18TEC4周期	1	是	1				是	2TEC
241	35	55	6	4	1	71	1	3	2	52	1	0	0	0	1	2007-11-13	2012-08-01	1	56	0	96	2019/9/1	TNBC	Ⅱb						否	0
242	66	33	0	1	0	35	0	0.6	1	未闭经	0	0	0	0	1	2007-11-13	2019/9	0	96	0	96	2019/9/1	TNBC		2007.11.29 CEF方案6周期	1	否	0	否	否	0	否	否
243	63	26	11	0	0	55	1	4.5	2	50	1	0	0	1	1	2007-03-01	2019/9	0	96	0	96	2019/9/1	HER2过表达型	Ⅱa	3.12FEC	1	无	0		无	0
244	63	37	0	0	0	54	1	3.3	2	51	1	1	1	1	1	2009-03-24	2019/9	0	96	0	96	2019/9/1	HER2过表达型	Ⅱa	4.3TEC5周期	1	无	0		来曲唑5年	1
245	44	49	7	0	0	39	0	4	2	未绝经	0	1	1	1	1	2009-04-08	2014-03-01	1	58	1	81	2016-02-01	HER2过表达型	Ⅱa	4.21FEC6周期	1	无	0		他莫昔芬	1
246	46	41	7	6	0	72	1	3	2	42	1	0	0	1	1	2009-09-28	2019/9	0	96	0	96	2019/9/1	HER2过表达型	Ⅱa	赫赛汀	1	否	0		否	0
247	78	22	0	0	0	45	0	0.5	1	未闭经	0	0	1	0	1	2007-12-10	2019/9	0	96	0	96	2019/9/1	luminal A		2007.11.25CEF	1
248	68	29	0	3	2	73	1	2.5	2	52	1	0	0	0	1	2006-07-05	2011-12-20	1	65	0	96	2019/9/1	TNBC	Ⅱb
249	62	31	7	0	0	50	0	2	1	未闭经	0	1	1	0	1	2006-05-31	2019/9	0	96	0	96	2019/9/1	luminal A	Ⅱa	2006.06.15 NE方案3周期	1	否	0	否	否	0	否	否
250	55	43	0	2	3	54	1	2.5	2	48	1	0	0	0	1	2009-11-16	2011-05-01	1	17	0	96	2019/9/1	TNBC	Ⅲc	肺转移后1TP-5TC后希罗达维持后6NC	1	是	1				是	2FEC-4TP
251	66	34	0	0	3	51	1	2	1	46	1	1	0	0	1	2006-11-06	2019/9	0	96	0	96	2019/9/1	luminal A	Ⅲc	CEF方案6周期	1	是	1	胸壁、锁骨上	否	0	否	否
252	56	44	0	0	1	70	1	3.5	2	46	1	0	0	0	1	2006-11-06	2019/9	0	96	0	96	2019/9/1	TNBC	Ⅱb	否	0	是	1	胸壁、锁骨上	否	0	否	否
253	67	33	0	0	0		1	0.5	1	未绝经	0	0	0	0	1	2006-05-29	2019/9	0	96	0	96	2019/9/1	TNBC
254	68	32	0	0	3	55	1	1.5	1	54	1	1	1	0	1	2006-05-16	2019/9	0	96	0	96	2014-08-01	luminal A	Ⅲc	CEF方案6周期	1	是	1	胸壁、锁骨上	是，芙瑞口服二年	1	否	否
255	69	31	0	0	3	62	1	2	1	57	1	1	1	0	1	2007-12-28	2019/9	0	96	0	96	2019/9/1	luminal A	Ⅲc	TEC方案6周期	1	否	0	否	否	0	否	否
256	59	41	0	0	0	37	0	2.2	2	未闭经	0	0	0	0	1	2006-05-29	2019/9	0	96	0	96	2016-02-01	TNBC	Ⅱa	CEF方案6周期	1	否	0	否	是，他莫昔芬口服二年	1	否	否
257	59	38	3	0	0	49	0	3	2	未闭经	0	1	0	0	1	2006-11-06	2019/9	0	96	0	96	2019/9/1	luminal A	Ⅱa	CEF方案6周期	1	否	0	否	否	0	否	否
258	59	41	0	0	3	50	0	3	2	48	1	1	1	0	1	2006-11-15	2019/9	0	96	0	96	2019/9/1	luminal A	Ⅲc	TAC案6周期	1	是	1	胸壁、锁骨上	否	0	否	否
259	53	42	0	5	1	65	1	2	1	58	1	0	0	0	1	2007-10-07	2011-01-01	1	38	1	43	2011-06-01	TNBC	Ⅱb	2009-10-25 CEF*6	1	是	1	胸壁复发后放疗
260	59	40	0	1	0	42	0	3	2	未闭经	0	1	0	0	1	2006-04-24	2012-12-01	1	67	0	96	2019/9/1	luminal A	Ⅲc	2006.04.27 CEF方案6周期	1	否	0	否	否	0	否	否
261	68	32	0	0	0	49	0	1.5	1	未闭经	0	1	1	0	1	2007-12-25	2019/9	0	96	0	96	2019/9/1	luminal A	Ⅰ	2008.1.9CEF*6	1
262	67	33	0	0	3	55	1	2.2	2	53	1	1	0	1	3	2008-04-21	2009-04-01	1	11	0	96	2019/9/1	HER2过表达型	Ⅲc	未化疗	0	无	0		无	0
263	57	37	6	0	0	48	0	1.5	1	未绝经	0	0	0	0	3	2008-12-26	2019/9	0	96	0	96	2019/9/1	TNBC	Ⅰ	2009.1.8TEC	1	否	0
264	60	40	0	0	1	41	0	2	1	未绝经	0	1	1	1	1	2009-06-26	2017/6	0	95	1	95	2017-06-01	HER2过表达型	Ⅱb	7.8FEC2周期	1	否	0		否	0
265	52	48	0	0	0	52	1	3	2	未闭经	0	1	1	0	1	2006-11-22	2019/9	0	96	0	96	2019/9/1	luminal A	Ⅱa	CEF方案6周期	1	否	0	否	否	0	否	否
266	52	43	5	0	0	41	0	0.5	1	未闭经	0	1	1	0	1	2008-01-03	2019/9	0	96	0	96	2019/9/1	luminal A		2008.01.17 CEF方案6周期	1	否	0	否	是、具体药物和时间不详待随访	1	否	否
267	58	42	0	0	0	33	0	0.5	1	未闭经	0	0	0	0	1	2006-05-29	2019/9	0	96	0	96	2019/9/1	TNBC		CEF方案6周期	1	否	0	否	否	0	否	否
268	50	49	0	1	0	45	0	4	2	未闭经	0	1	1	0	1	2006-07-12	2012-04-01	1	68	0	96	2019/9/1	luminal A	Ⅱa	2006.7.25CEF*2	1
269	55	38	7	0	0	43	0	2.4	2	未绝经	0	0	0	1	2	2007-03-27	2019/9	0	96	0	96	2019/9/1	HER2过表达型	Ⅱa	4.6FEC	1	是	1		无	0
270	77	23	0	0	0	48	0	1	1	未闭经	0	1	1	0	3	2008-04-01	2019/9	0	96	0	96	2019/9/1	luminal B				是	1	胸壁+ 锁骨上下	他莫昔芬	1	是	3TEC
271	73	27	0	0	0	45	0	2.5	2	未绝经	0	0	0	0	3	2009-03-25	2015/9	0	77	1	77	2015-09-01	TNBC	Ⅱa	4.29NE6周期	1	无	0
272	60	33	7	0	0	34	0	2.2	2	未绝经	0	0	0	1	1	2007-10-22	2019/9	0	96	0	96	2019/9/1	HER2过表达型	Ⅱa			无	0		无	0
273	63	37	0	0	0	46	0	2.2	2	未绝经	0	0	0	0	3	2009-10-26	2019/9	0	96	0	96	2019/9/1	TNBC	Ⅱa			否	0
274	59	39	0	2	3	53	1	1.2	1	52	1	0	0	1	1	2007-01-29	2008/4	1	14	1	76	2013-06-01	HER2过表达型	Ⅲc	2.5T-EC7周期	1
275	74	26	0	0	0	58	1	3	2	53	1	1	0	0	1	2006-12-07	2019/9	0	96	0	96	2019/9/1	luminal A	Ⅱa	术后2006-12-13 CEF方案	1
276	52	46	0	2	1	51	1	3.5	2	未闭经	0	0	0	0	1	2006-09-30	2012-07-01	1	69	0	96	2019/9/1	TNBC	Ⅱb	2006.8.8CEF*6	1	是	1	右侧胸壁，锁骨上
277	57	39	3	1	0	38	0	3	2	未闭经	0	0	0	0	1	2006-06-16	2019/9	0	96	0	96	2019/9/1	TNBC	Ⅱa	2006.07.02 CEF方案6周期	1	否	0	否	否	0	否	否
278	60	38	0	2	0	46	0	1.3	1	未绝经	0	0	0	0	1	2008-05-23	2019/9	0	96	0	96	2019/9/1	TNBC	Ⅰ	6.4TEC6周期	1	否	0
279	55	44	0	1	0	55	1	1	1	51	1	1	1	0	1	2006-06-21	2019/9	0	96	0	96	2019/9/1	luminal A	Ⅲc	2006.6.27CAF*6	1	否	0		是，他莫昔芬5年	1
280	70	30	0	0	0	37	0	0.5	1	未闭经	0	0	1	0	1	2006-07-19	2019/9	0	96	0	96	2019/9/1	luminal A		2006.7.6TEC*6	1	否	0
281	58	42	0	0	0	53	1	2.7	2	51	1	0	0	0	3	2009-03-27	2016-01-01	1	81	0	96	2019/9/1	TNBC	Ⅱa	4.8TEC6周期	1	无	0
282	58	42	0	0	0	59	1	2.1	2	未绝经	0	0	0	0	2	2009-06-22	2019/9	0	96	0	96	2019/9/1	TNBC	Ⅱa	7.23NP5周期	1	有	1
283	62	38	0	0	1	52	1	2	1	未绝经	0	0	0	0	1	2009-12-23	2019/9	0	96	0	96	2019/9/1	TNBC	Ⅱb	12.31FEC	1	是	1
284	53	39	0	8	1	48	0	2.1	2	未绝经	0	0	0	0	3	2009-04-24	2012-10-01	1	41	1	79	2015-12-01	TNBC	Ⅱb	5.20AC-T8周期	1	是	1
285	63	33	4	0	0	50	0	1.5	1	未闭经	0	0	1	0	1	2007-11-20	2019/9	0	96	0	96	2019/9/1	luminal A	Ⅰ	否	0	局部复发后放疗	1	胸壁、锁骨上	否	0	否	否
286	58	42	0	0	0	49	0	1.5	1	未闭经	0	0	0	0	1	2006-07-14	2011-09-01	1	61	0	96	2019/9/1	TNBC	Ⅰ	2006.7.26NE	1
287	62	38	0	0	0	52	1	0.5	1	49	1	0	0	0	1	2007-11-27	2019/9	0	80	1	80	2014-08-01	TNBC		2007.12.06 CEF方案6周期	1	否	0	否	否	0	否	否
288	61	39	0	0	0	57	1	2.5	2	48岁子宫切除	1	0	0	0	3	2008-06-26	2019/9	0	96	0	96	2019/9/1	TNBC	Ⅱa	7.8NP	1	否	0
289	53	42	0	5	0	35	0	2.2	2	未绝经	0	0	0	0	3	2009-10-14	2014-02-01	1	51	0	96	2019/9/1	TNBC	Ⅱa	10.24TP6周期	1	是	1
290	61	39	0	0	0	55	1	1.3	1	未绝经	0	0	0	0	1	2008-09-01	2019/9	0	96	0	96	2019/9/1	TNBC	Ⅰ	9.9FEC3周期	1	否	0
291	51	38	11	0	2	38	0	0.5	1	未闭经	0	0	0	0	1	2006-05-19	2019/9	0	96	0	96	2019/9/1	TNBC	Ⅲa	TEC方案6周期	1	是	1	胸壁、锁骨上	是，三苯氧胺口服二年	1	否	否
292	47	41	9	3	0		1	2.6	2	未绝经	0	1	1	0	3	2006-12-06	2010-01-01	1	36	1	36	2010-01-01	luminal B		2008-04-15 TEC	1						是	TEC5周期
293	63	37	0	0	0	53	1	2.5	2	52	1	0	0	0	2	2009-05-12	2019/9	0	96	0	96	2019/9/1	TNBC	Ⅱa	6.5TAC6周期	1	无	0
294	67	32	0	1	0	35	0	3.2	2	未绝经	0	0	0	1	1	2009-04-21	2019/9	0	96	0	96	2019/9/1	HER2过表达型	Ⅱa	4.28TEC5周期	1	是	1		无	0
295	61	39	0	0	0	50	0	1.9	1	48	1	0	0	0	2	2009-05-14	2019/9	0	96	0	96	2019/9/1	TNBC	Ⅰ	6.1T3周期-3AC	1	无	0
296	68	32	0	0	0	53	1	2	1	50	1	0	0	0	3	2008-04-25	2019/9	0	96	0	96	2019/9/1	TNBC	Ⅱa	5.7NP1周期	1	是	1
297	65	35	0	0	1	64	1	2.5	2	50	1	0	0	0	2	2008-12-26	2016-01-01	1	84	1	92	2016-09-01	TNBC	Ⅱb	2009.1.2FEC6周期	1	是	1
298	60	40	0	0	0	52	1	2.8	2	51	1	0	0	0	3	2008-09-18	2019/9	0	96	0	96	2019/9/1	TNBC	Ⅱa	10.22EC5周期	1	否	0
299	52	39	7	2	3	45	0	3.1	2	未绝经	0	1	1	1	3	2008-11-21	2014-12-01	1	60	0	96	2019/9/1	HER2过表达型	Ⅲc	11.28TEC6周期	1	是	1		他莫昔芬	1
300	51	44	5	0	1	54	1	1.8	1	50	1	1	1	0	1	2007-11-29	2019/9	1	69	0	96	2019/9/1	luminal A	Ⅱa	2007.12.10CEF*6	1	是	1	胸壁，锁骨上	是，他莫昔芬5年	1
301	69	31	0	0	0	37	0	3	2	未绝经	0	0	0	0	2	2008-12-23	2019/9	1	63	0	96	2019/9/1	TNBC	Ⅱa	12.29FEC6周期	1	是	1
302	72	28	0	0	2	50	0	0.8	1	48	1	1	1	0	1	2006-11-09	2019/9	0	96	0	96	2019/9/1	luminal A	Ⅱa	CEF方案6周期	1	否	0	否	否	0	否	否
303	61	39	0	0	1	54	1	2.2	2	51岁子宫切除	1	0	0	0	3	2009-07-17	2014-06-01	1	58	0	96	2019/9/1	TNBC	Ⅱb	8.12TP6周期	1
304	65	35	0	0	0	74	1	1	1	50	1	0	0	0	1	2009-07-17	2019/9	0	96	0	96	2019/9/1	TNBC	Ⅰ			是	1	左乳房
305	58	42	0	0	0	45	0	2.2	2	未绝经	0	0	0	0	3	2009-02-27	2015-01-01	1	70	1	81	2015-12-01	TNBC	Ⅱa	3.6FEC5周期	1	无	0
306	55	39	0	6	0	73	1	1.5	1	47	1	0	0	0	1	2009-06-04	2019/9	0	96	0	96	2019/9/1	TNBC	Ⅰ			是	1	全乳房
307	63	37	0	0	0	41	0	0.5	1	未绝经	0	0	0	0	3	2008-11-24	2009-06-01	1	6	0	96	2019/9/1	TNBC		12.4NE6周期	1						是	6TCH
308	67	33	0	0	0	35	0	2.2	2	未绝经	0	0	0	0	3	2009-10-14	2014-02-01	1	51	0	96	2019/9/1	TNBC	Ⅱa	10.24TP6周期	1	是	1
309	61	39	0	0	0	51	1	2.1	2	未绝经	0	0	0	0	3	2009-07-28	2019/9	0	96	0	96	2019/9/1	TNBC	Ⅱa	8.10TEC6周期	1
310	61	39	0	0	2	40	0	3	2	未绝经	0	0	0	0	3	2009-11-16	2019/9	0	96	0	96	2019/9/1	TNBC	Ⅲa	11.24TEC6周期	1	是	1
311	49	49	0	2	0	44	0	1.6	1	未绝经	0	0	0	0	1	2008-08-26	2014-02-01	1	65	1	81	2015-06-01	TNBC	Ⅰ	9.5TEC	1	是	1
312	46	35	19	0	0	39	0	1.5	1	未闭经	0	0	0	0	1	2006-11-15	2010-01-01	1	37	0	96	2019/9/1	TNBC	Ⅰ	CEF方案6周期	1	否	0	否	否	0	否	否
313	53	41	0	6	3	70	1	2	1	52	1	0	0	0	3	2009-04-07	2010-01-01	1	8	0	96	2019/9/1	TNBC	Ⅲc	5.4TEC6周期	1	是	1
314	38	56	2	4	1	56	1	1	1	49	1	1	1	0	3	2007-09-10	2009-03-01	1	17	1	29	2010-03-01	luminal B									是	来曲唑（弗隆）6个月
315	51	44	0	5	0	38	0	1.5	1	未绝经	0	0	0	0	3	2009-02-16	2015-06-01	1	75	0	96	2019/9/1	TNBC	Ⅰ	2.23TEC	1	无	0
316	63	37	0	0	0	55	1	2.2	2	40	1	0	0	0	1	2009-05-31	2019/9	0	96	0	96	2019/9/1	TNBC	Ⅱa			无	0
317	39	48	11	2	0	56	1	2	1	44	1	0	0	0	1	2006-10-23	2011-07-01	1	56	0	96	2019/9/1	TNBC	Ⅱa	CEF方案6周期	1	否	0	否	否	0	否	否
318	57	38	5	0	2	52	1	2.3	2	49	1	0	0	0	1	2008-04-30	2019/9	0	96	0	96	2019/9/1	TNBC	Ⅲa	5.9TC6周期	1	是	1
319	62	38	0	0	1	66	1	3	2	未绝经	0	1	1	0	1	2006-07-19	2011-01-01	0	96	0	96	2019/9/1	luminal A	Ⅱb	否	0	否	0		是，弗隆，时长不详	1
320	63	37	0	0	0	35	0	1.2	1	未闭经	0	1	1	0	1	2007-12-05	2019/9	0	96	0	96	2019/9/1	luminal A		2007.12.13NE*6	1	是	1	乳腺，瘤床	是，他莫昔芬1年半（因子宫内膜增厚自行停药）；2011.2淋巴结转移后改OFS+来曲唑	1
321	67	33	0	0	0	56	1	2.5	2	48	1	0	0	0	1	2006-07-12	2019/9	0	96	0	96	2019/9/1	TNBC	Ⅱa	2006.7.18CEF	1
322	42	53	4	1	1	46	0	1	1	未闭经	0	1	1	0	1	2006-06-14	2012-05-01	1	70	0	96	2016-08-01	luminal A	Ⅱa	2006.6.20CEF	1
323	73	27	0	0	0	49	0	1.5	1	未闭经	0	0	1	0	1	2006-06-27	2019/9	0	96	0	96	2019/9/1	luminal A	Ⅰ	2006.7.7CEF	1
324	63	37	0	0	0	56	1	1	1	28	1	0	0	0	1	2006-06-27	2012-08-01	1	73	0	96	2019/9/1	TNBC	Ⅰ	2006.7.31CEF	1
325	70	30	0	0	0	54	1	2.5	2	51	1	0	0	1	1	2008-09-23	2019/9	0	96	0	96	2019/9/1	HER2过表达型	Ⅱa	9.27FEC	1	是	1		无	0
326	69	29	0	2	0	58	1	2	1	52	1	1	1	0	1	2007-12-18	2019/9	0	96	0	96	2019/9/1	luminal A	Ⅱa	2008.01.02 NE方案6周期	1	否	0	否	否	0	否	否
327	61	39	0	0	0		1	0.5	1	未绝经	0	0	0	0	1	2006-05-31	2019/9	0	96	0	96	2019/9/1	TNBC
328	59	41	0	0	0	54	1	3.5	2	未闭经	0	0	0	0	1	2006-04-24	2019/9	0	96	0	96	2019/9/1	TNBC	Ⅱa	CEF方案6周期	1	是	1	胸壁、锁骨上	否	0	否	否
329	60	36	4	0	0	30	0	0.2	1	未闭经	0	0	1	0	1	2007-11-06	2019/9	0	96	0	96	2019/9/1	luminal A		CEF方案6周期	1	否	0	否	否	0	否	否
330	63	35	2	0	0	52	1	3.5	2	50	1	1	1	0	1	2006-04-21	2019/9	0	96	0	96	2019/9/1	luminal A	Ⅱa	否	0	否	0	否	否	0	否	否
331	54	44	0	2	0	50	0	1.1	1	48	1	1	1	0	1	2006-07-29	2012-01-01	1	60	0	96	2019/9/1	luminal A	Ⅰ	2006.8.1CEF*6	1	否	0		是，它莫昔芬2年，弗隆3年	1
332	69	31	0	0	3	48	0	3	2	未绝经	0	0	0	0	2	2008-07-07	2009-03-01	1	7	0	96	2019/9/1	TNBC	Ⅲc	7.16FEC6周期	1	是	1
333	75	25	0	0	1	58	1	1.5	1	53	1	1	1	0	1	2006-12-06	2019/9	0	96	0	96	2019/9/1	luminal A	Ⅱa						来曲唑（弗隆)5年	1	是	6CEF
334	74	26	0	0	1	63	1	3	2	46	1	0	1	0	1	2006-12-06	2019/9	0	96	0	96	2019/9/1	luminal A	Ⅱb
335	55	43	0	2	1	56	1	5.5	3	45	1	0	0	0	3	2009-02-06	2012-07-01	1	40	0	96	2019/9/1	TNBC	Ⅲa	2.13FEC6周期	1	是	1
336	69	31	0	0	0	43	0	1.2	1	未闭经	0	0	0	0	1	2006-10-20	2012-08-01	1	69	0	96	2019/9/1	TNBC	Ⅰ
337	66	34	0	0	0	53	1	1.5	1	44	1	0	0	0	1	2006-12-11	2019/9	0	96	0	96	2015-08-01	TNBC	Ⅰ	2006-12-22 CEF	1	是	1	乳房+胸壁
338	72	28	0	0	1		0	0.5	1	已绝经	1	0	0	0	1	2006-12-06	2012-09-01	1	68	0	96	2019/9/1	TNBC							他莫昔芬，复发后来曲唑，耐药后氟维司群	1
339	61	39	0	0	0	73	1	2.2	2	48	1	0	0	0	3	2008-10-07	2019/9	0	96	0	96	2019/9/1	TNBC	Ⅱa	未化疗	0	是	1
340	43	37	20	0	0	41	0	1.8	1	未绝经	0	0	0	0	1	2008-12-24	2019/9	0	96	0	96	2019/9/1	TNBC	Ⅰ	2009.1.4FAC	1	否	0
341	65	35	0	0	0	60	1	1.8	1	55	1	0	0	0	2	2008-12-19	2014-06-01	1	65	0	96	2019/9/1	TNBC	Ⅰ	12.30NP	1	否	0
342	56	44	0	0	0	58	1	3.5	2	55	1	0	0	0	3	2009-12-07	2019/9	0	96	0	96	2019/9/1	TNBC	Ⅱa	12.31TEC6周期	1	否	0
343	64	36	0	0	0	50	0	3.5	2	未绝经	0	0	1	1	1	2007-08-13	2019/9	0	96	0	96	2019/9/1	HER2过表达型	Ⅱa	8.22FEC	1	无	0		无	0
344	69	31	0	0	0	40	0	0.5	1	未闭经	0	1	1	0	1	2006-06-06	2019/9	0	96	0	96	2019/9/1	luminal A		只查到1次新辅助信息CEF	1							CEF
345	59	41	0	0	1	36	0	2	1	未闭经	0	1	1	0	1	2008-02-27	2019/9	0	96	0	96	2019/9/1	luminal A	Ⅱb	2008.03.09 TEC方案6周期	1	否	0	否	否	0	是	TEC方案4次
346	59	41	0	0	3	53	1	2.2	2	50	1	1	1	0	3	2009-12-29	2012-12-01	1	35	1	40	2013-05-24	luminal B	Ⅲc	2010.1.26TE6周期	1	是	1		来曲唑至2012.12	1
347	55	40	5	0	0	46	0	1.5	1	未绝经	0	0	0	0	3	2008-10-14	2019/9	0	96	0	96	2019/9/1	TNBC	Ⅰ	10.27NE	1	否	0
348	41	59	0	0	0	62	1	1	1	50	1	0	0	0	1	2006-11-24	2019/9	0	96	0	96	2019/9/1	TNBC	Ⅰ	TEC方案6周期	1	否	0	否	是，弗隆口服四年	1	否	否
349	62	31	7	0	1	50	0	2	1	48	1	0	0	1	1	2008-04-02	2019/9	0	96	0	96	2019/9/1	HER2过表达型	Ⅱb	4.8FEC	1	无	0		无	0
350	49	46	0	5	0	58	1	2	1	52	1	0	0	0	1	2007-08-27	2010-03-01	1	30	0	96	2019/9/1	TNBC	Ⅱa	2007-9-8CEF方案	1	否	0
351	72	28	0	0	1	53	1	1.5	1	51	1	1	1	0	1	2006-12-29	2019/9	0	96	0	96	2019/9/1	luminal A	Ⅱa
352	56	38	0	6	3	57	1	2.5	2	52	1	0	0	0	1	2008-01-18	2010-06-09	1	28	1	28	2010-06-09	TNBC		2008-2-14一次NE+一次TEC	1	是	1	胸壁+锁骨上下+内乳			是	4NE
353	51	46	0	3	0	53	1	2.5	2	未绝经	0	0	0	0	2	2008-11-21	2019/9	0	96	0	96	2019/9/1	TNBC	Ⅱa	11.2FEC	1	否	0
354	47	47	3	3	3	53	1	1.2	1	52	1	0	0	1	1	2007-01-29	2008/4	1	14	1	76	2013-06-01	HER2过表达型	Ⅲc	2.5T-EC7周期	1
355	49	30	21	0	1	48	0	2.2	2	未绝经	0	0	0	0	1	2008-03-07	2019/9	0	96	0	96	2019/9/1	TNBC	Ⅱb	3.18NP	1	否	0

## Sheet: testing group
序号	CD44+/CD24+	CD44-/CD24-	CD44-/CD24+	CD44+/CD24-	N分期	年龄	Age(51)	tumor size	T分期	是否绝经 绝经1 未绝经0	ER状态	PR状态	HER2状态	Ki67状态	手术日期	转移时间(原)	转移	DFS	死亡	OS	死亡时间	分型	临床分期	术后首次化疗开始时间2009年(方案)	是否化疗（0否1是）	是否放疗	是否放疗（0否1是）	放疗方案	是否内分泌治疗（药物，持续时间）	内分泌（0否1是）	新辅助化疗	新辅助化疗方案和周期
1	53	41	0	6	1	74	1	1.5	1	1	1	1	0	1	2013-03-29	2019/9	0	77	0	77	2019/9/1	luminal A	Ⅱa						依西美坦	1
2	70	30	0	0	0	44	1	2.2	2	1	1	1	1	2	2013-07-26	2015/2	0	18	1	18	2015-02-01	HER2过表达型	Ⅱa	2013.8.20 2T-4TCH	1
3	66	34	0	0	1	69	1	2.5	2	1	0	0	0	2	2011-03-21	2012/5	1	13	1	13	2012-05-01	TNBC	Ⅱb
4	57	41	0	2	0	61	1	3	2	1	1	1	0	1	2013-06-17	2019/9	0	74	0	74	2019/9/1	luminal A	Ⅱa	2013.7.9TCH2周期	1						是	TCH4周期
5	61	39	0	0	0	59	1	5.5	3	1	0	0	0	1	2010-07-09	2019/9	0	96	0	96	2019/9/1	TNBC	Ⅱb	2010.8.11NE2周期	1	是	1				是	4NE
6	69	31	0	0	0	59	1	1	1	1	0	0	0	3	2011-10-19	2019/9	0	94	0	94	2019/9/1	TNBC	Ⅰ	2007.10本院左乳癌改良根治术，术后6次CEF,2011-10-25行右乳癌改良根治术术后CTX+氟尿嘧啶	1	是	1
7	60	40	0	0	0	44	1	1.5	1	0	1	1	1	2	2013-02-28	2019/9	0	78	0	78	2019/9/1	HER2过表达型	Ⅰ						他莫昔芬	1
8	63	37	0	0	0	70	1	3.1	2	0	1	1	0	1	2013-05-09	2019/9	0	75	0	75	2019/9/1	luminal A	Ⅱa	2013.5.20TC4周期	1
9	66	34	0	0	0	45	1	1.2	1	0	0	0	1	3	2011-08-03	2015/9	0	49	1	49	2015-10-01	HER2过表达型	Ⅰ	2011.8.26TEC6周期	1	是	1		他莫昔芬	1
10	20	35	40	5	3	72	1	5	2	1	1	0	0	3	2010-12-17	2012-08-01	1	19	1	43	2014-08-01	luminal B	Ⅲc	2011.1.12EC6周期	1	是	1		来曲唑	1	是	来曲唑9个月
11	53	37	0	10	0	50	1	1.5	1	1	1	1	0	1	2013-03-05	2019/9	0	77	0	77	2019/9/1	luminal A	Ⅰ	2013.03.19 6TEC	1
12	24	29	47	0	0	55	1	2.7	2	1	0	0	1	3	2010-03-17	2019/9	0	96	0	96	2019/9/1	HER2过表达型	Ⅱa	2010.3.26TEC	1	否	0		否	0
13	71	29	0	0	0	71	1	3	2	1	0	0	0	3	2011-02-14	2019/9	0	96	0	96	2019/9/1	TNBC	Ⅱa	2011.3.14AC-T8周期	1	否	0
14	59	41	0	0	0	64	1	2.5	2	0	1	0	1	3	2012-10-16	2014/5	0	18	1	18	2014-05-01	HER2过表达型	Ⅱa	2012.11.8TEC4周期	1
15	53	47	0	0	2	40	1	4	2	0	0	0	1	3	2011-11-22	2019/9	1	53	0	93	2019/9/1	HER2过表达型	Ⅰ	2011.12.19TCH6周期	1	是	1		无	0
16	56	41	0	3	2	35	1	4.5	2	0	0	0	0	2	2013-02-21	2013-12-01	1	9	1	24	2015-03-01	TNBC	Ⅱb	2013.3.4TEC	1	是	1
17	62	38	0	0	1	50	1	3	2	0	1	1	0	3	2013-03-27	2019/9	0	77	0	77	2019/9/1	luminal B	Ⅱb	2015.4.18TEC6周期	1	是	1
18	62	38	0	0	0	52	1	2.1	2	0	1	1	0	3	2013-01-29	2019/9	0	79	0	79	2019/9/1	luminal B	Ⅱa	2013.2.7TEC	1				他莫昔芬	1
19	64	36	0	0	0	55	1	1.2	1	1	0	0	0	3	2010-12-24	2019/9	0	96	0	96	2019/9/1	TNBC	Ⅰ	2011.1.18TEC6周期	1	是	1
20	73	27	0	0	1	66	1	4.8	2	1	0	0	0	2	2011-07-05	2019/9	0	96	0	96	2019/9/1	TNBC	Ⅱb	2011.7.29TEC4周期	1	是	1				是	2TEC
21	59	39	2	0	1	40	0	7	3	0	0	0	0	1	2010-11-08	2019/9	0	96	0	96	2019/9/1	TNBC	Ⅲa	2010.11.16TP1周期	1	是	1				是	4NE-1TP
22	63	34	0	3	0	63	1	2.5	2	1	1	1	1	3	2010-03-03	2013-07-01	1	39	0	96	2019/9/1	HER2过表达型	Ⅱa	2010.4.2TC4周期	1				来曲唑	1
23	44	37	19	0	0	58	1	3.3	2	1	0	0	1	2	2012-10-12	2019/9	0	82	0	82	2019/9/1	HER2过表达型	Ⅱa	2012.10.25TC4周期	1
24	58	36	6	0	1	40	1	2	1	0	1	1	0	2	2013-03-20	2019/9	0	77	0	77	2019/9/1	luminal B	Ⅱb	2013.4.12TEC6周期	1	是	1
25	59	39	0	2	3	47	0	3	2	0	0	0	0	2	2010-06-30	2015-01-01	1	66	0	96	2019/9/1	TNBC	Ⅲc			是	1	左胸壁+锁骨上下			是	6FEC
26	61	39	0	0	0	50	1	5	2	0	1	1	0	1	2013-04-07	2019/9	0	76	0	76	2019/9/1	luminal A	Ⅱb	2013.15.3TEC2周期	1	是	1				是	TEC4周期
27	53	41	0	6	0	45	1	1	1	0	1	1	0	1	2013-01-15	2019/9	0	79	0	79	2019/9/1	luminal A	Ⅰ	2013.1.29TC2周期	1
28	53	45	2	0	0	59	1	2	1	1	1	1	0	2	2013-08-07	2019/9	0	72	0	72	2019/9/1	luminal A	Ⅱa	胸壁复发后4EC-4T	1	复发放疗	1	右胸壁及右锁骨上	来曲唑	1
29	64	36	0	0	0	53	1	2.2	2	1	0	0	0	2	2011-03-24	2019/9	0	96	0	96	2019/9/1	TNBC	Ⅱa	2011.4.6TP6周期	1	是	1
30	60	40	0	0	1	58	1	2.8	2	1	0	0	1	2	2013-08-09	2019/9	0	72	0	72	2019/9/1	HER2过表达型	Ⅱb	2013.8.23TEC6周期	1				无	0
31	48	44	0	8	2	51	1	2.2	2	0	1	1	1	3	2013-07-23	2015-02-01	1	13	1	18	2015-02-01	HER2过表达型	Ⅲa	2013.8.2EC-T8周期	1	是	1		他莫昔芬	1
32	63	37	0	0	0	56	1	3	2	1	0	0	0	1	2010-03-26	2019/9	0	96	0	96	2019/9/1	TNBC	Ⅱa	2010.5.5FEC5周期	1	无	0
33	61	39	0	0	0	43	1	1.5	1	0	0	0	0	3	2012-12-21	2019/9	0	80	0	80	2019/9/1	TNBC	Ⅰ	2013.1.28TC4周期	1
34	64	31	5	0	0	51	1	3.5	2	0	1	1	0	2	2013-04-16	2019/9	0	76	0	76	2019/9/1	luminal B	Ⅱa	2013.5.5TEC4周期	1	是	1				是	TEC2周期
35	58	41	1	0	0	40	0	2.2	2	0	0	0	0	3	2010-11-08	2019/9	0	96	0	96	2019/9/1	TNBC	Ⅱa	2010.11.16TEC4周期	1	否	0
36	63	37	0	0	0	49	1	3	2	1	0	0	1	2	2013-03-08	2019/9	0	77	0	77	2019/9/1	Her2过表达型	Ⅱa	2013.04.02 6TEC	1	无	0
37	67	33	0	0	0	62	1	2.5	2	1	0	0	1	2	2012-06-01	2019/9	0	87	0	87	2019/9/1	HER2过表达型	Ⅱa	2012.6.19FEC6周期	1
38	59	41	0	0	3	50	1	2.5	2	0	0	0	1	3	2011-08-25	2019/9	0	96	0	96	2019/9/1	HER2过表达型	Ⅲc	2011.9.6TEC5周期	1	是	1		不清楚
39	60	36	4	0	0	61	1	2.5	2	1	0	0	0	1	2012-06-12	2019/9	0	86	0	86	2019/9/1	TNBC	Ⅱa	2012.7.6TG	1
40	53	38	9	0	0	55	1	2.8	2	0	1	0	1	3	2012-10-12	2019/9	0	82	0	82	2019/9/1	HER2过表达型	Ⅱa	2012.11.6TEC66周期	1
41	61	39	0	0	0	60	1	1	1	1	1	1	0	1	2013-05-30	2019/9	0	75	0	75	2019/9/1	luminal A	Ⅰ						来曲唑	1
42	54	43	3	0	0	72	1	1.8	1	1	1	1	0	1	2013-01-06	2019/9	0	79	0	79	2019/9/1	luminal A	Ⅰ						来曲唑	1
43	76	24	0	0	1	58	1	3	2	1	1	1	1	2	2013-03-14	2019/9	0	77	0	77	2019/9/1	HER2过表达型	Ⅱb	2013.04.8EC-TH8周期	1	是	1
44	66	34	0	0	0	61	1	2.5	2	1	0	0	0	3	2011-02-18	2019/9	0	96	0	96	2019/9/1	TNBC	Ⅱa	2011.3.2TP6周期	1	否	0
45	59	41	0	0	1	58	1	5.5	3	1	1	1	1	3	2013-04-10	2019/9	0	76	0	76	2019/9/1	HER2过表达型	Ⅲa	2015.4.19T-EC8周期	1	是	1
46	55	38	5	2	2	57	1	1.9	1	1	1	1	0	3	2013-01-31	2019/9	0	79	0	79	2019/9/1	luminal B	Ⅲa	2013.2.26EC-t8周期	1	是	1		他莫昔芬	1
47	60	31	9	0	0	59	1	4	2	1	1	1	0	3	2013-01-17	2019/9	0	79	0	79	2019/9/1	luminal B	Ⅱa	2013.1.29TC4周期	1				来曲唑	1
48	61	39	0	0	0	61	1	2.1	2	1	0	0	1	2	2013-03-08	2019/9	0	77	0	77	2019/9/1	Her2过表达型	Ⅱa	2013.03.15 2TC	1	否	0
49	63	37	0	0	0	59	1	1.3	1	1	1	1	1	3	2011-09-07	2019/9	0	95	0	95	2019/9/1	HER2过表达型	Ⅰ	2011.10.9T-EC7周期	1	是	1		来曲唑	1
50	61	39	0	0	0	52	1	3	2	1	1	1	0	1	2013-03-01	2019/9	0	78	0	78	2019/9/1	luminal A	Ⅱa	2013.03.12 6TC	1
51	64	36	0	0	1	50	0	2.5	2	1	1	1	0	3	2013-01-23	2019/9	0	79	0	79	2019/9/1	luminal B	Ⅱb	2013.2.26TP6周期	1
52	60	40	0	0	0	55	1	1.5	1	0	1	1	0	1	2013-05-07	2019/9	0	75	0	75	2019/9/1	luminal A	Ⅰ	2013.5.20TC6周期	1
53	49	51	0	0	0	61	1	0.3	1	1	1	1	0	1	2013-03-04	2019/9	0	77	0	77	2019/9/1	luminal A		2013.3.26TC4周期	1	2013.3.26TC4周期	0		来曲唑（弗隆)	1
54	69	31	0	0	1	42	1	4	2	1	0	0	0	3	2011-06-07	2019/9	0	96	0	96	2019/9/1	TNBC	Ⅱb	2011.6.15TEC4周期	1	是	1				是	2TEC
55	66	31	3	0	0	58	1	3.3	2	1	1	1	1	2	2013-03-05	2019/9	0	77	0	77	2019/9/1	HER2过表达型	Ⅱa			无	0
56	59	41	0	0	0	49	1	2.3	2	0	0	0	0	3	2011-02-15	2019/9	0	96	0	96	2019/9/1	TNBC	Ⅱa	2011.3.14AC-T8周期	1	否	0
57	63	37	0	0	0	56	1	2.5	2	1	1	1	0	1	2013-03-19	2019/9	0	77	0	77	2019/9/1	luminal A	Ⅱa	2013.4.12TC6周期	1				来曲唑	1
58	44	47	4	5	1	53	1	2.2	2	1	1	0	1	3	2012-10-19	2013-06-01	1	7	1	29	2015-04-01	HER2过表达型	Ⅱb	2012.10.30FEC3周期-2T	1				来曲唑	1
59	10	41	47	2	0	65	1	2.1	2	1	1	1	1	2	2012-10-11	2019/4	1	60	0	82	2019/9/1	HER2过表达型	Ⅱa	2012.11.13TEC6周期	1	否	0
60	63	37	0	0	0	55	1	4	2	1	0	0	1	3	2010-07-20	2019/9	0	96	0	96	2019/9/1	HER2过表达型	Ⅱa	2010.8.4FEC2周期	1	是	1		否	0	是	4FEC
61	55	31	9	5	0	39	0	2.2	2	0	1	1	1	3	2010-11-08	2019/9	0	96	0	96	2019/9/1	HER2过表达型	Ⅱa	2010.11.17TEC6周期	1	是	1		否	0
62	55	37	8	0	1	56	1	1.7	1	1	0	0	1	2	2011-05-11	2016/1	0	55	1	55	2016-01-01	HER2过表达型	Ⅱa			否	0		否	0
63	57	41	0	2	1	47	1	1.5	1	0	1	1	0	1	2011-04-22	2014-01-01	1	32	1	60	2016-05-01	luminal A	Ⅱa	2011.5.15FEC-T8周期	1	是	1		他莫昔芬	1
64	67	33	0	0	1	48	1	3	2	0	1	1	0	2	2013-04-23	2019/9	0	76	0	76	2019/9/1	luminal A	Ⅱb	2013.5.20TEC6周期	1
65	50	45	5	0	1	43	1	4	2	0	0	0	1	3	2011-11-02	2017/12	0	72	1	72	2017-12-01	HER2过表达型	Ⅱa	2011.11.18TEC6周期	1	是	1		无	0
66	54	27	19	0	3	60	1	2.5	2	0	0	0	1	2	2012-10-12	2019/9	1	29	1	29	2015-04-01	HER2过表达型	Ⅲc	2012.10.24TEC6周期	1	是	1
67	68	32	0	0	1	57	1	2	1	1	0	0	1	2	2013-08-12	2019/9	0	72	0	72	2019/9/1	HER2过表达型	Ⅱb	2013.9.9T-EC8周期	1				无	0
68	48	47	0	5	0	64	1	2	1	0	1	1	0	2	2013-05-09	2019/9	0	75	0	75	2019/9/1	luminal A	Ⅱa						来曲唑	1
69	63	37	0	0	0	50	1	2	1	0	1	1	0	2	2013-03-06	2019/9	0	77	0	77	2019/9/1	luminal A	Ⅱa	2013.04.10 6TEC	1	是	1
70	61	39	0	0	0	48	1	3	2	1	0	0	0	3	2011-04-20	2019/9	0	96	0	96	2019/9/1	TNBC	Ⅱa	2011.5.10TP6周期	1	否	0
71	56	41	0	3	0	60	1	2.5	2	1	0	0	0	1	2013-06-06	2019/9	0	74	0	74	2019/9/1	TNBC	Ⅱa	2013.7.4TP4周期	1						是	TP2周期
72	62	38	0	0	0	58	1	2.2	2	1	0	0	0	3	2010-01-05	2019/9	0	96	0	96	2019/9/1	TNBC	Ⅱa	2010.1.18FEC	1	无	0
73	67	33	0	0	0	40	0	2	1	0	0	0	0	3	2010-05-19	2019/9	0	96	0	96	2019/9/1	TNBC	Ⅱa	2010.6.14TP6周期	1	无	0
74	62	38	0	0	0	56	1	1.3	1	0	0	0	0	3	2011-04-06	2019/9	0	96	0	96	2019/9/1	TNBC	Ⅰ	2011.5.4TP6周期	1	否	0
75	48	47	0	5	1	44	0	2.8	2	0	1	1	0	3	2010-01-07	2012-09-01	1	31	1	54	2014-08-01	luminal B	Ⅱb	2010.1.18FEC6周期	1				他莫昔芬	1
76	28	50	17	5	0	47	1	2.2	2	0	0	0	0	3	2011-05-12	2019/9	0	96	0	96	2019/9/1	TNBC	Ⅱa	2011.6.13TEC6周期	1	否	0
77	60	40	0	0	0	45	1	2.8	2	0	0	0	0	3	2011-06-17	2019/9	0	96	0	96	2019/9/1	TNBC	Ⅱa	2011.6.28TP6周期	1	否	0
78	64	36	0	0	0	57	1	1	1	1	1	0	0	1	2013-07-03	2019/9	0	73	0	73	2019/9/1	luminal A	Ⅰ	2013.8.7TC2周期	1	是	1				是	TEC3周期
79	59	41	0	0	0	44	1	2	1	0	1	1	0	2	2013-01-18	2019/9	0	79	0	79	2019/9/1	luminal B	Ⅱa	2013.1.29TC4周期	1	是	1
80	38	41	19	2	0	36	0	1	1	0	1	0	1	3	2010-07-30	2014-06-01	1	46	0	96	2019/9/1	HER2过表达型	Ⅰ	2010.8.17TAC3周期	1	是	1		他莫昔芬1个月	1
81	55	40	3	2	2	55	1	5.2	3	1	0	0	1	1	2013-05-31	2014-06-01	1	12	0	75	2019/9/1	HER2过表达型	Ⅲa	2013.6.26TEC4周期	1	是	1				是	TEC4周期
82	60	40	0	0	1	45	0	2.5	2	0	0	0	0	3	2010-05-13	2019/9	0	96	0	96	2019/9/1	TNBC	Ⅱb	2010.5.26FEC	1	无	0
83	62	38	0	0	3	56	1	2.8	2	1	1	0	0	1	2013-06-08	2019/9	0	74	0	74	2019/9/1	luminal A	Ⅲc	2013.07.02 2TEC	1	是	1				是	TEC4个周期
84	58	37	0	5	1	31	0	1.5	1	0	1	1	0	1	2013-06-24	2019/9	0	74	0	74	2019/9/1	luminal A	Ⅱa	2013.7.3TEC6周期	1
85	59	37	0	4	1	56	1	2	1	1	0	0	0	3	2010-03-03	2010-06-01	1	27	0	96	2019/9/1	TNBC	Ⅱb	2010.3.10TP4周期	1	是	1
86	62	27	11	0	0	55	1	2.5	2	0	1	1	1	3	2013-01-24	2019/9	0	79	0	79	2019/9/1	HER2过表达型	Ⅱa	2013.2.5TC6周期	1	无	0
87	59	34	5	2	0	43	0	2.5	2	0	0	0	1	3	2012-08-29	2019/9	0	84	0	84	2019/9/1	HER2过表达型	Ⅱa	2012.9.19TEC6周期	1	否	0
88	63	37	0	0	3	63	1	2.1	2	1	0	0	1	3	2011-07-21	2019/9	0	96	0	96	2019/9/1	HER2过表达型	Ⅲc	2011.8.15TEC6周期	1	是	1		不清楚
89	56	42	0	2	1	50	0	3	2	0	1	1	1	3	2012-11-09	2018-09-01	1	69	0	81	2019/9/1	HER2过表达型	Ⅱb	2012.11.20.FEC6周期	1	是	1
90	59	41	0	0	0	49	0	1.7	1	1	0	0	1	3	2010-08-27	2019/9	0	96	0	96	2019/9/1	HER2过表达型	Ⅰ	2010.9.21TC+赫赛汀6周期	1	是	1		福美坦	1
91	58	42	0	0	1	57	1	2.1	2	1	1	1	1	1	2012-09-04	2013-06-01	1	8	0	83	2019/9/1	HER2过表达型	Ⅱb	2012.9.27T6周期	1	是	1		来曲唑	1
92	61	39	0	0	0	56	1	2	1	0	0	0	1	2	2011-12-05	2019/9	0	92	0	92	2019/9/1	HER2过表达型	Ⅱa	2011.12.29TEC+赫赛汀6周期	1	否	0		否	0
93	62	38	0	0	0	44	1	1.5	1	0	1	1	1	2	2013-02-28	2019/9	0	78	0	78	2019/9/1	HER2过表达型	Ⅰ						他莫昔芬	1
94	51	35	11	3	0	35	1	2.1	2	0	0	0	0	3	2011-05-31	2011-12-01	1	6	1	16	2012-10-01	TNBC	Ⅱa	2011.6.17TP1周期	1	否	0
95	46	49	0	5	3	56	1	2.5	2	1	1	0	0	2	2011-10-14	2013-12-01	1	25	1	38	2015-01-01	luminal A	Ⅲc	2011.10.20TEC2周期	1	是	1		来曲唑	1	是	4TEC
96	52	46	0	2	0	61	1	3	2	1	1	1	0	2	2013-03-22	2019/9	0	77	0	77	2019/9/1	luminal B	Ⅱa	2013.4.2TEC6周期	1
97	64	36	0	0	0	57	1	2	1	1	0	0	0	3	2013-01-29	2019/9	0	79	0	79	2019/9/1	TNBC	Ⅱa	2013.2.27T-EC8周期	1
98	61	39	0	0	1	34	1	1.4	1	0	1	1	0	3	2013-01-19	2019/9	0	79	0	79	2019/9/1	luminal B	Ⅱa	2013.1.7FEC-T6周期	1	是	1		戈舍瑞林	1
99	37	45	13	5	0	55	1	2	1	0	0	0	0	3	2012-12-18	2014-09-01	1	20	1	29	2015-06-01	TNBC	Ⅱa	2013.1.7TE6周期	1	是	1
100	64	36	0	0	0	54	1	2.3	2	1	0	0	1	2	2011-06-21	2019/9	0	96	0	96	2019/9/1	HER2过表达型	Ⅱa	2011.7.5FEC3周期	1	否	0		否	0
101	61	39	0	0	0	49	0	2.6	2	0	1	1	1	3	2012-10-23	2019/9	0	82	0	82	2019/9/1	HER2过表达型	Ⅱa	2012.11.15EC2周期-6TCH	1	否	0
102	62	38	0	0	1	57	1	2.1	2	0	1	1	1	1	2012-09-04	2013-06-01	1	8	0	83	2019/9/1	HER2过表达型	Ⅱb	2012.9.27T6周期	1	是	1		来曲唑	1
103	61	39	0	0	1	56	1	2.1	2	1	1	1	0	2	2013-05-21	2019/9	0	75	0	75	2019/9/1	luminal B	Ⅱb	2013.6.14EC-T8周期	1
104	58	41	0	1	3	65	1	3	2	1	0	0	0	2	2012-08-14	2013-06-01	1	9	1	9	2013-06-01	TNBC	Ⅲc
105	49	49	0	2	0	64	1	6	3	0	1	1	0	1	2013-03-22	2019/9	0	77	0	77	2019/9/1	luminal A	Ⅱb	2013.4.3TC2周期	1
106	64	36	0	0	0	59	1	3	2	0	1	1	0	2	2013-01-18	2019/9	0	79	0	79	2019/9/1	luminal A	Ⅱa	2013.2.18FEC6周期	1				来曲唑	1
107	61	39	0	0	0	61	1	1	1	1	1	1	0	2	2013-01-11	2019/9	0	79	0	79	2019/9/1	luminal A	Ⅰ						来曲唑	1
108	59	41	0	0	1	61	1	2	1	1	1	1	0	2	2013-03-15	2019/9	0	77	0	77	2019/9/1	luminal A	Ⅱb	2013.04.02 6TEC	1
109	57	40	0	3	1	49	0	1.5	1	0	0	0	0	1	2012-10-23	2013-07-01	1	8	1	29	2015-04-01	TNBC	Ⅱa	2012.11.7EC-T8周期	1
110	53	45	0	2	1	56	1	2.6	2	1	0	0	0	3	2010-05-15	2011-05-01	1	11	1	46	2014-04-01	TNBC	Ⅱb	2010.6.8TP6周期	1	是	1
111	64	31	5	0	1	47	0	3.5	2	0	1	1	0	3	2012-06-08	2015/5	0	34	1	34	2015-05-01	luminal B	Ⅱb	2012.7.3TEC1周期+TCH5周期	1
112	47	37	16	0	1	54	1	6	3	1	0	0	0	3	2010-04-02	2019-05-01	0	96	0	96	2019/9/1	TNBC	Ⅲa	2010.4.8TP	1	无	0
113	53	45	0	2	0	62	1	2.2	2	1	1	1	0	1	2013-01-30	2019/9	0	63	1	63	2018-05-01	luminal A	Ⅱa	2013.2.8TC6周期	1
114	77	23	0	0	0	53	1	2.5	2	0	1	0	0	1	2013-05-08	2019/9	0	75	0	75	2019/9/1	luminal A	Ⅱa	2013.5.20EC	1				来曲唑	1
115	64	36	0	0	0	50	1	2.5	2	1	1	1	1	3	2011-11-29	2019/9	0	93	0	93	2019/9/1	HER2过表达型	Ⅱa	2011.1.13FEC-T6周期	1	不清楚			阿那曲唑 5年	1
116	61	36	3	0	0	60	1	2.5	2	1	0	0	0	2	2010-07-29	2019/9	0	96	0	96	2019/9/1	TNBC	Ⅱa	2010.7.9FEC3周期	1	否	0
117	48	48	0	4	1	51	1	2.2	2	1	1	1	0	2	2012-04-24	2019/9	0	88	0	88	2019/9/1	luminal B	Ⅱb	2012.5.21TEC6周期	1
118	43	57	0	0	0	50	1	3	2	0	0	0	1	2	2013-03-16	2019/9	0	77	0	77	2019/9/1	HER2过表达型	Ⅱa	2013.03.19 TEC	1	是	1
119	60	37	3	0	0	41	1	3	2	0	0	0	1	3	2011-05-17	2019/9	0	96	0	96	2019/9/1	HER2过表达型	Ⅱa	2011.7.5TG6周期	1
120	51	40	4	5	0	61	1	2	1	1	1	1	0	2	2013-03-12	2019/9	0	77	0	77	2019/9/1	luminal A	Ⅱa	2013.4.7FEC6周期	1				依西美坦	1
121	39	41	20	0	2	53	1	7	3	0	1	0	1	2	2013-04-27	2019/9	1	17	0	76	2019/9/1	HER2过表达型	Ⅲa	2013.5.22TEC2周期	1	是	1		阿那曲唑	1	是	TEC4周期
122	56	36	0	8	0	65	1	1.2	1	1	1	1	0	1	2013-03-15	2019/9	0	77	0	77	2019/9/1	luminal A	Ⅰ	2.13.04.20TC4周期	1
123	61	37	2	0	1	49	1	2	1	0	1	0	1	2	2013-02-20	2018-03-01	1	60	0	78	2019/9/1	HER2过表达型		2013.2.27TEC5周期	1	无	0				是	TEC1周期
124	57	41	0	2	3	62	1	2.3	2	0	1	1	0	3	2013-01-31	2014-03-01	1	13	1	74	2019-04-01	luminal B	Ⅲc	2013.2.26EC-t8周期	1	是	1		依西美坦2个月，来曲唑4个月，依西美坦	1
125	66	34	0	0	0	53	1	4	2	0	0	0	1	2	2011-07-20	2019/9	0	96	0	96	2019/9/1	HER2过表达型	Ⅱa	2011.8.15TEC4周期	1	否	0		否	0	是	2TEC
126	48	38	14	0	1	57	1	2.1	2	1	0	0	0	3	2011-06-13	2019/9	0	96	0	96	2019/9/1	TNBC	Ⅱb	2011.6.20TEC6周期	1	是	1
127	67	27	0	6	0	68	1	2.4	2	1	1	0	1	2	2012-04-01	2019/9	0	89	0	89	2019/9/1	HER2过表达型	Ⅱa
128	57	43	0	0	0	67	1	2.1	2	1	1	1	0	2	2013-01-16	2019/9	0	40	1	40	2016-06-01	luminal A	Ⅱa						来曲唑	1
129	65	35	0	0	0	49	0	5	2	1	0	0	1	3	2012-03-02	2019/1	0	81	1	81	2019-01-01	HER2过表达型	Ⅱb	2012.3.15TEC2周期	1	否	0
130	63	37	0	0	0	66	1	3	2	1	1	1	0	1	2013-03-19	2019/9	0	77	0	77	2019/9/1	luminal A	Ⅱa	2013.04.16 8EC-T	1
131	57	43	0	0	0	58	1	2.2	2	1	0	0	0	2	2010-04-21	2015-05-01	1	60	1	72	2016-04-27	TNBC	Ⅱa	2010.5.18TP6周期	1	无	0
132	53	41	6	0	3	39	1	6	3	0	0	0	1	3	2011-09-29	2019/9	1	48	1	56	2016-06-01	HER2过表达型	Ⅲc	2011.10.9TEC1周期	1	是	1		是	1	是	5TEC
133	33	40	27	0	1	68	1	2.5	2	1	1	1	0	3	2012-04-09	2019/9	0	88	0	88	2019/9/1	luminal B	Ⅱb	2012.5.14TH6周期	1	否	0		来曲唑	1
134	65	35	0	0	3	35	0	0.2	1	0	0	1	0	3	2010-12-17	2015-01-01	1	48	1	76	2017-05-01	luminal B		2011.1.15TC3周期	1	是	1		他莫昔芬+戈舍瑞林	1	是	5FEC
135	51	45	0	4	3	57	1	3	2	1	1	1	1	3	2011-12-06	2012-05-01	1	4	1	41	2015-06-01	HER2过表达型	Ⅲc	TP6周期	1	是	1		无	0
136	63	34	0	3	0	58	1	3	2	1	0	0	1	3	2012-03-01	2013-03-01	1	12	0	90	2019/9/1	HER2过表达型	Ⅱa	2012.3.13T-EC8周期	1				他莫昔芬	1
137	61	39	0	0	0	45	1	2.5	2	0	0	0	0	3	2011-03-22	2019/9	0	96	0	96	2019/9/1	TNBC	Ⅱa	2011.4.1TEC4周期	1	是	1
138	59	41	0	0	0	60	1	2.5	2	1	1	1	0	2	2013-04-16	2019/9	0	76	0	76	2019/9/1	luminal A	Ⅱa	2013.4.28TC6周期	1
139	58	40	2	0	0	50	1	1.5	1	0	1	1	0	1	2013-02-20	2019/9	0	78	0	78	2019/9/1	luminal A	Ⅰ	2013.3.1TC4周期	1				他莫昔芬1年4个月，2015，后改为戈舍瑞林+阿那曲唑。	1
140	51	44	0	5	2	55	1	3	2	1	0	0	0	3	2010-12-06	2012-11-01	1	22	1	26	2013-03-01	TNBC	Ⅲa	2010.12.15FEC6周期	1	是	1
141	55	42	0	3	3	59	1	3.5	2	1	1	1	0	1	2013-03-04	2013-06-01	1	2	1	21	2015-01-01	luminal A	Ⅲc			是	1		来曲唑	1	是	TE8周期
142	50	50	0	0	0	71	1	1.8	1	0	0	0	0	3	2010-01-19	2017/5	1	87	1	87	2017-05-01	TNBC	Ⅰ	2010.1.27TEC	1	无	0
143	52	44	0	4	2	46	0	2.3	2	0	0	1	0	3	2012-08-28	2013-08-01	1	11	1	35	2015-08-01	luminal B	Ⅱb	2012.9.21TEC6周期	1	是	1
144	46	43	7	4	0	62	1	4	2	1	1	1	1	3	2012-08-21	2014-10-01	1	20	1	41	2016-02-01	HER2过表达型	Ⅱa	2012.9.3FEC2周期	1				他莫昔芬至2014.5换用依西美坦	1
145	68	32	0	0	0	46	1	2.4	2	1	0	0	0	3	2011-03-30	2019/9	0	96	0	96	2019/9/1	TNBC	Ⅱa	2011.5.4TP6周期	1	否	0
146	56	42	0	2	2	47	1	4.1	2	0	1	1	1	2	2013-02-01	2014-12-02	1	22	1	39	2016-05-01	HER2过表达型	Ⅲa	2013.2.26TEC6周期	1	是	1		他莫昔芬	1
147	59	41	0	0	1	42	1	3	2	0	0	0	1	3	2011-10-13	2019/9	0	94	0	94	2019/9/1	HER2过表达型	Ⅱb	2011.10.24TEC6周期	1	否	0		无	0
148	43	41	11	5	0	30	1	1.5	1	0	1	1	1	3	2013-02-05	2019/9	0	78	0	78	2019/9/1	HER2过表达型	Ⅰ	2013.2.18TEC2周期-TCH4周期	1	是	1		戈舍瑞林	1
149	57	41	0	2	0	56	1	2.9	2	1	1	1	0	3	2012-02-13	2015-04-01	0	41	1	41	2015-08-01	luminal B	Ⅱa	2012.3.8TEC6周期	1	是	1		来曲唑	1
150	63	37	0	0	3	54	1	4	2	1	1	0	0	3	2012-02-28	2014-01-01	1	22	1	59	2017-02-01	luminal B	Ⅲc	2012.3.21FEC4周期	1	是	1		阿那曲唑	1
151	60	40	0	0	0	53	1	1.9	1	1	1	1	0	1	2013-04-09	2019/9	0	76	0	76	2019/9/1	luminal A	Ⅰ	2013.5.3EC-T8周期	1						是	TEC3周期
152	50	48	0	2	2	25	0	2.2	2	0	1	1	0	2	2012-11-06	2015-07-01	1	31	1	31	2015-07-01	luminal A	Ⅲa			是	1	左乳+锁骨上下	他莫昔芬+戈舍瑞林	1	是	6TEC
153	55	43	0	2	0	47	0	2.5	2	1	0	0	0	3	2010-07-02	2019/9	0	96	0	96	2019/9/1	TNBC	Ⅱa	2010.7.13NE6周期	1	否	0
154	61	39	0	0	0	47	0	1.9	1	0	0	0	0	3	2010-12-10	2019/9	0	96	0	96	2019/9/1	TNBC	Ⅰ	2010.1.5FEC1周期-5TP	1	是	1
155	48	52	0	0	1	47	1	2.5	2	0	1	1	0	3	2013-02-04	2019/9	0	78	0	78	2019/9/1	luminal B	Ⅱb	2013.3.11TC4周期	1
156	63	37	0	0	0	68	1	2.2	2	1	0	0	0	3	2010-01-22	2019/9	0	96	0	96	2019/9/1	TNBC	Ⅱa	2010.2.9NP6周期	1	无	0
157	55	43	0	2	0	58	1	2.1	2	1	0	0	0	3	2010-07-19	2011-12-01	1	4	0	96	2019/9/1	TNBC	Ⅱa	2010.8.17TEC1周期-5TP	1	否	0
158	51	46	3	0	3	41	1	3	2	0	1	1	1	2	2013-04-19	2019/9	0	76	0	76	2019/9/1	HER2过表达型	Ⅲc	2013.4.28TEC	1	是	1
159	57	41	0	2	0	66	1	1	1	1	0	0	0	2	2010-11-12	2019/9	0	96	0	96	2019/9/1	TNBC	Ⅰ	2010.12.14TP6周期	1	否	0
160	61	39	0	0	0	60	1	3	2	1	0	0	1	2	2013-07-30	2016-02-01	1	30	1	37	2016-09-01	HER2过表达型	Ⅱa	2013.8.13TEC	1				否	0
161	54	41	5	0	2	40	0	2.3	2	0	1	1	0	3	2012-02-22	2018-04-01	1	73	1	81	2018-12-01	luminal B	Ⅲa	2012.3.7GT6周期	1	是	1		双附件切除	1
162	61	32	7	0	0	59	1	1.2	1	1	1	0	1	2	2013-03-01	2019/9	0	78	0	78	2019/9/1	HER2过表达型	Ⅰ	2013.3.7TEC	1						是	TEC1周期
163	66	34	0	0	0	47	0	2.3	2	0	0	0	0	2	2010-06-07	2019/9	0	96	0	96	2019/9/1	TNBC	Ⅱa			否	0
164	60	40	0	0	0	62	1	3.5	2	1	1	1	0	1	2013-03-26	2019/9	0	77	0	77	2019/9/1	luminal A	Ⅱa	2013.4.08T-EC8周期	1				来曲唑	1
165	54	42	0	4	0	45	1	4	2	1	0	1	0	2	2011-06-01	2019/9	0	96	0	96	2019/9/1	luminal A	Ⅱa	2011.6.10FEC2周期	1	是	1				是	4FEC
166	60	40	0	0	1	59	1	2	1	1	1	1	0	2	2013-05-08	2019/9	0	75	0	75	2019/9/1	luminal A	Ⅱb	2013.5.30EC-T8周期	1	是	1		阿那曲唑	1
167	52	40	8	0	1	49	1	2.2	2	0	1	1	1	2	2011-11-28	2019/9	0	93	0	93	2019/9/1	HER2过表达型	Ⅱb	2011.12.8FEC	1	否	0		他莫昔芬 4年	1
168	61	39	0	0	1	47	1	0.5	1	0	1	1	0	1	2013-04-07	2019/9	0	76	0	76	2019/9/1	luminal A		2013.5TEC2周期	1	是	1				是	TEC4周期+放疗
169	67	33	0	0	1	50	0	4	2	0	0	0	0	3	2010-12-10	2019/9	0	96	0	96	2019/9/1	TNBC	Ⅱb	2010.12.16TP3周期	1	是	1				是	2TP
170	63	37	0	0	0	52	1	1.1	1	0	1	1	0	1	2013-04-23	2019/9	0	76	0	76	2019/9/1	luminal A	Ⅰ	2013.05.21 4TC	1	是	1		他莫昔芬	1
171	63	33	4	0	2	40	0	1.5	1	0	0	0	0	3	2010-11-17	2019/9	0	96	0	96	2019/9/1	TNBC	Ⅱa	2010.12.22CTF6周期	1	是	1
172	57	34	9	0	0	39	1	2.5	2	0	0	0	0	3	2012-12-25	2019/9	0	80	0	80	2019/9/1	TNBC	Ⅱa	2013.1.25T-EC8周期赫赛汀单药	1
173	56	39	0	5	1	43	1	2.4	2	0	1	1	1	1	2013-07-30	2019/9	0	73	0	73	2019/9/1	HER2过表达型	Ⅱb						他莫昔芬	1
174	53	47	0	0	1	44	1	2.5	2	0	1	1	0	2	2013-04-23	2019/9	0	76	0	76	2019/9/1	luminal A	Ⅱb	2013.5.14TAC4周期	1						是	2TAC
175	63	37	0	0	0	68	1	1.5	1	0	1	1	0	3	2013-02-20	2019/9	0	78	0	78	2019/9/1	luminal B	Ⅰ						来曲唑	1
176	71	29	0	0	0	56	1	4	2	1	1	1	0	2	2013-05-02	2019/9	0	75	0	75	2019/9/1	luminal B	Ⅱa	2013.5.13T-EC8周期	1				来曲唑	1
177	60	40	0	0	3	62	1	3.5	2	1	0	0	1	2	2012-10-22	2014-11-01	1	35	1	62	2017-12-30	HER2过表达型	Ⅲc	2012.11.16TEC4周期	1	是	1				是	2TEC
178	38	54	0	8	0	72	1	1.5	1	1	1	1	0	1	2013-04-12	2019/9	0	76	0	76	2019/9/1	luminal A	Ⅰ						来曲唑	1
179	55	36	9	0	0	65	1	1.5	1	1	1	1	0	2	2013-04-24	2019/9	0	76	0	76	2019/9/1	luminal A	Ⅰ	2013.5.17TC4周期	1
180	57	43	0	0	2	52	1	2.5	2	1	1	1	0	2	2013-03-12	2019/9	0	77	0	77	2019/9/1	luminal A	Ⅲa	20130.3.21 6TEC	1	是	1
181	54	37	7	2	0	47	1	2.1	2	0	0	0	0	2	2010-12-29	2019/9	0	96	0	96	2019/9/1	TNBC	Ⅱa	2011.1.30TC4周期	1	否	0
182	69	31	0	0	1	35	1	3	2	0	1	1	0	2	2013-04-24	2019/9	0	76	0	76	2019/9/1	luminal A	Ⅱb	2013.5.7TEC6周期	1	是	1
183	40	60	0	0	1	57	1	7	3	1	0	0	1	2	2012-10-22	2015/1	0	26	1	26	2015-01-01	HER2过表达型	Ⅲa	2012.11.16TEC5周期	1	是	1				是	1TEC
184	45	51	0	4	2	44	0	6	3	0	0	0	0	3	2012-11-12	2013-10-01	1	10	1	30	2015-06-01	TNBC	Ⅲa	2012.12.7TEC1周期-2TP	1	是	1				是	2TEC
185	53	45	0	2	0	42	0	2.5	2	0	1	1	0	3	2012-02-21	2019/9	0	90	0	90	2019/9/1	luminal B	Ⅱa	2012.2.28TEC6周期	1	否	0		他莫昔芬 4年	1
186	66	29	5	0	3	59	1	3	2	0	0	0	0	2	2013-04-16	2015/4	1	10	1	23	2015-04-01	TNBC	Ⅲc	术后TEC2周期	1	是	1				是	TEC4周期
187	51	47	0	2	0	61	1	2.4	2	1	0	0	1	2	2013-02-28	2019/9	0	78	0	78	2019/9/1	HER2过表达型	Ⅱa			无	0
188	60	40	0	0	0	50	1	2	1	0	0	0	1	3	2011-11-30	2014-04-01	1	28	1	66	2017-06-01	HER2过表达型	Ⅱa	2011.12.7TP2周期	1	是	1		无	0
189	35	59	0	6	1	51	1	1.4	1	1	0	0	0	1	2013-08-14	2019/9	1	35	1	63	2018-12-01	TNBC	Ⅱa	2013.8.29TEC	1
190	48	43	5	4	1	43	0	2.4	2	0	0	0	0	3	2013-05-17	2019/9	0	75	0	75	2019/9/1	TNBC	Ⅱb	2013.5.28TEC6周期	1
191	54	41	3	2	3	62	1	2.3	2	0	1	1	0	3	2013-01-31	2014-03-01	1	13	1	74	2019-04-01	luminal B	Ⅲc	2013.2.26EC-t8周期	1	是	1		依西美坦2个月，来曲唑4个月，依西美坦	1
192	61	37	0	2	0	55	1	2	1	1	1	0	0	2	2013-04-22	2019/9	0	76	0	76	2019/9/1	luminal B	Ⅱa	2013.5.3FEC6周期	1
193	67	33	0	0	1	54	1	2.2	2	1	1	1	0	1	2013-02-22	2019/9	0	78	0	78	2019/9/1	luminal A	Ⅱb	2013.3.25EC-T8周期	1				来曲唑	1
194	72	28	0	0	0	59	1	3.1	2	1	0	0	0	3	2010-04-06	2019/9	1	59	0	96	2019/9/1	TNBC	Ⅱa	2010.5.5TP6周期	1	无	0
195	57	43	0	0	1	48	0	2.5	2	0	1	1	0	2	2012-04-13	2019/9	0	88	0	88	2019/9/1	luminal B	Ⅱb	2012.4.23TEC6周期	1
196	61	39	0	0	0	45	1	2.5	2	0	1	1	0	1	2013-01-15	2019/9	0	79	0	79	2019/9/1	luminal A	Ⅱa	2013.1.25TEC6周期	1				他莫昔芬	1
197	61	39	0	0	1	33	1	2.5	2	0	0	0	0	2	2011-01-07	2019/9	1	43	0	96	2019/9/1	TNBC	Ⅱa	2011.1.17TEC6周期	1	是	1
198	58	42	0	0	1	58	1	2.3	2	1	1	1	0	3	2013-01-18	2019/9	0	79	0	79	2019/9/1	luminal B	Ⅱb	2013.2.21TEC5周期	1
199	51	32	17	0	2	39	0	1.5	1	0	0	0	1	3	2012-10-11	2014/7	0	21	1	21	2014-08-01	HER2过表达型	Ⅱa	2012.11.13TP4周期	1	是	1
200	51	47	0	2	1	59	1	3	2	1	1	0	1	3	2012-10-09	2017/5	0	54	1	54	2017-05-01	HER2过表达型	Ⅱb	2012.10.31TEC6周期	1	否	0
201	60	33	7	0	0	48	0	2.5	2	1	0	0	0	3	2010-04-28	2019/9	0	96	0	96	2019/9/1	TNBC	Ⅱa	2010.5.11TP2周期	1	是	1
202	60	40	0	0	0	50	1	2	1	0	1	1	0	3	2013-02-06	2019/9	0	78	0	78	2019/9/1	luminal B	Ⅱa	2013.2.20TEC6周期	1	是	1
203	69	31	0	0	2	55	1	2.5	2	1	1	1	0	1	2013-03-01	2019/9	0	78	0	78	2019/9/1	luminal A	Ⅲa	2013.03.12 6TEC	1	是	1
204	58	37	0	5	0	61	1	2	1	1	1	1	0	1	2013-03-19	2019/9	0	77	0	77	2019/9/1	luminal A	Ⅱa						来曲唑	1
205	69	31	0	0	1	55	1	2.2	2	0	0	0	0	3	2013-02-22	2019/9	0	78	0	78	2019/9/1	TNBC	Ⅱb	2013.3.26T-EC8周期	1
206	52	43	2	3	1	51	1	2.3	2	0	0	0	0	3	2011-12-28	2013-10-01	1	21	0	92	2019/9/1	TNBC	Ⅱb	2012.2.2TEC6周期	1
207	63	37	0	0	0	65	1	2.8	2	1	1	0	0	2	2013-05-09	2019/9	0	75	0	75	2019/9/1	luminal B	Ⅱa	2013.5.20TC6周期	1				来曲唑	1
208	57	40	3	0	0	54	1	2.5	2	0	0	0	0	3	2011-02-17	2019/9	0	96	0	96	2019/9/1	TNBC	Ⅱa	2011.3.22FEC5周期	1	否	0
209	54	43	0	3	0	60	1	2.6	2	1	1	1	0	1	2013-03-14	2019/9	0	76	1	76	2019-08-01	luminal A	Ⅱa	2013.4.10TC6周期	1	2013.4.10TC6周期
210	59	41	0	0	1	50	1	3	2	0	1	0	0	2	2013-07-16	2019/9	1	41	1	42	2017-02-01	luminal A	Ⅱb	2013.8.8AC-T8周期	1	是	1		否	0
211	61	39	0	0	1	54	1	2.5	2	0	1	1	0	1	2012-09-28	2015-01-01	1	44	1	53	2017-03-05	luminal A	Ⅱb	2012.10.30T-EC8周期	1
212	62	38	0	0	1	61	1	2	1	1	0	0	0	3	2011-04-12	2019/9	0	96	0	96	2019/9/1	TNBC	Ⅱb	6TEC外院	1	是	1
213	61	39	0	0	1	59	1	3	2	1	1	1	0	3	2013-04-08	2019/9	0	76	0	76	2019/9/1	luminal B	Ⅱb	2013.5.7T-EC8周期	1
214	64	36	0	0	1	43	1	2.5	2	0	1	1	0	1	2013-04-09	2019/9	0	76	0	76	2019/9/1	luminal A	Ⅱb	2013.5.4TEC6周期	1	是	1
215	5	36	55	4	3	59	1	2.5	2	1	0	0	1	3	2012-10-18	2014-07-01	1	20	1	27	2015-02-01	HER2过表达型	Ⅲc	2012.10.25TEC2周期-1TC	1						是	2TG
216	63	37	0	0	1	51	1	4	2	0	0	0	1	2	2013-04-16	2019/9	0	76	0	76	2019/9/1	HER2过表达型	Ⅱb	2013.5.14TEC3周期	1	是	1				是	TEC3周期
217	60	40	0	0	1	26	0	3	2	0	0	0	0	3	2010-03-22	2019/9	0	96	0	96	2019/9/1	TNBC	Ⅱb	2010.4.1TFC6周期	1	是	1
218	46	47	7	0	0	47	0	3	2	0	0	0	0	3	2010-09-17	2019/9	0	96	0	96	2019/9/1	TNBC	Ⅱa	2010.9.29TP6周期	1	否	0
219	67	33	0	0	1	51	1	2.3	2	0	1	1	0	3	2012-03-22	2015/12	0	44	1	44	2015-12-01	luminal B	Ⅱb	2012.4.17TC6周期	1
220	51	44	0	5	1	61	1	2	1	1	1	1	0	2	2013-03-15	2015/12	0	33	1	33	2016-01-01	luminal A	Ⅱb	2013.04.02 6TEC	1
221	61	37	0	2	0	38	0	10	3	0	0	0	0	1	2012-12-17	2019/9	0	80	0	80	2019/9/1	TNBC	Ⅱb			是	1				是	2TEC+4TCH
