# Supplementary material for: Association of human breast cancer CD44-/CD24- cells with delayed distant metastasis
Source: eLife. 2021 Jul 28;10:e65418. doi: 10.7554/eLife.65418 (PMC8346282; doi:10.7554/eLife.65418)
Supplement: Supplementary file 2. [file elife-65418-supp2.xlsx]

## Sheet: Sheet1
Supplementary File 2	The table of Youden Index
variable: CD44-CD24 -
cut-off value	Sensitivity	1 - Specificity		Sensitivity+Specificity-1
-1	1	1		0
1	1	0.996		0.004
2.5	1	0.988		0.012
3.5	1	0.976		0.024
4.5	1	0.972		0.028
5.5	0.99	0.94		0.05
6.5	0.99	0.92		0.07
7.5	0.962	0.868		0.094
8.5	0.943	0.844		0.099
9.5	0.933	0.788		0.145
10.5	0.895	0.76		0.135
11.5	0.876	0.696		0.18
12.5	0.876	0.664		0.212
13.5	0.848	0.6		0.248
14.5	0.829	0.568		0.261
15.5	0.81	0.536		0.274
16.5	0.781	0.488		0.293
17.5	0.771	0.428		0.343
18.5	0.752	0.368		0.384
19.5	0.705	0.288		0.417
20.5	0.619	0.268		0.351
21.5	0.533	0.212		0.321
22.5	0.457	0.204		0.253
23.5	0.419	0.184		0.235
24.5	0.343	0.156		0.187
25.5	0.314	0.144		0.17
26.5	0.238	0.124		0.114
27.5	0.181	0.096		0.085
28.5	0.152	0.076		0.076
29.5	0.114	0.068		0.046
30.5	0.105	0.064		0.041
31.5	0.095	0.052		0.043
32.5	0.076	0.04		0.036
33.5	0.048	0.032		0.016
34.5	0.048	0.024		0.024
35.5	0.029	0.02		0.009
37.5	0.01	0.016		-0.006
40	0	0.008		-0.008
44	0	0.004		-0.004
48	0	0
